# Supplementary material for: Comparative genomics of the wheat fungal pathogen Pyrenophora tritici-repentis reveals chromosomal variations and genome plasticity
Source: BMC Genomics. 2018 Apr 23;19:279. doi: 10.1186/s12864-018-4680-3 (PMC5913888; doi:10.1186/s12864-018-4680-3)
Supplement: Supplementary file 5 — List of M4 de novo repeats and domains. (XLSX 29 kb) [file 12864_2018_4680_MOESM5_ESM.xlsx]

## Sheet: Sheet1
S5 Table. List of de novo repeats and domains
De novo repeat family ID	Length (bp)	Pfam domain descriptions
R15	20014	DUF4271 Velvet YfhO
R47	16021	Asp_protease_2 RVP_2 RVT_1 rve
R42	15226	Asp_protease_2 Chromo RVP_2 RVT_1 rve
R32	14245	Myosin_tail_1 RVT_1 rve
R28	14053	KfrA_N RVP_2 RVT_1 rve
R75	13860	Atrophin-1 Gag_spuma Herpes_BLLF1 Med3 Myosin_tail_1 RVT_1 UBN2 rve
R17	11417	Acyl_transf_3 Atrophin-1 DEAD DUF2074 Drf_FH1 Extensin_2 FAP TT_ORF1 Tymo_45kd_70kd YfhO
R24	11123	RVT_2 gag_pre-integrs rve
R56	10592	RVT_2 gag_pre-integrs rve
R14	10582	Chromo Ion_trans Protamine_P1 RVT_1 TT_ORF1 rve
R10	10547	RVT_2 Trypan_PARP UBN2 UBN2_2 rve
R12	10408	NMD3 RVT_2 gag_pre-integrs rve
R71	10370	AMP-binding Condensation PP-binding Tymo_45kd_70kd
R11	10365	RVT_2 gag_pre-integrs rve
R112	7808	RVT_1 RVT_3 rve
R58	7165	Dimer_Tnp_hAT
R147	6999	ADH_N ADH_zinc_N ADH_zinc_N_2 Acyl_transf_1 KR Methyltransf_11 Methyltransf_12 PP-binding adh_short
R35	6886	Atrophin-1 DEAD DUF2339 DUF3505 Drf_FH1 FAP GRP Helicase_C TT_ORF1 Tymo_45kd_70kd
R137	6714	Asp_protease_2 Chromo RVP_2 RVT_1 Retrotrans_gag rve zf-CCHC
R25	6322	Asp_protease_2 Chromo Pneumo_att_G RVP_2 RVT_1 Retrotrans_gag rve zf-CCHC
R45	6257	Dimer_Tnp_hAT
R40	6241	RNase_H RVT_1
R3	6144	Dimer_Tnp_hAT
R76	6096	Amelogenin DUF1421 MSSP Med15 Metallothio Metallothio_Euk Metallothionein PAT1 RVT_2 rve
R4	6085	Dimer_Tnp_hAT
R50	6062	Dimer_Tnp_hAT TT_ORF1
R8	6028	Amelogenin DUF1421 DUF4175 Glutenin_hmw Keratin_B2 MSSP Med15 Metallothio PAT1 RVT_2
R1	6005	RVT_2 rve
R104	5929	RVT_2 rve
R79	5880	RNase_H RVT_1
R91	5873	Dimer_Tnp_hAT Histone
R9	5830	Atrophin-1 DUF1777 DUF3729 DUF605 FAP MCPVI RVT_2 Transformer UBN2 rve
R5	5794	RVT_1
R20	5706	Herpes_BLLF1 Pneumo_att_G rve
R202	5428	DUF3432 DUF3664 DUF4045 RVT_2 Trypan_PARP UBN2 UBN2_2 rve
R7	5388	Dimer_Tnp_hAT
R59	5345	Dimer_Tnp_hAT
R38	5343	RVT_2 gag_pre-integrs rve
R130	5295	RVT_2 gag_pre-integrs
R154	5246	RVT_2 gag_pre-integrs rve
R87	5246	RVT_2 rve
R49	5200	RVT_2
R77	5021	RVT_2 rve
R19	5018	Dimer_Tnp_hAT Histone
R177	4657	Asp_protease_2 Chromo RVP_2 RVT_1 rve
R201	4305	DDE_1 HTH_Tnp_Tc5 p450
R78	3620	RNase_H RVT_1 RVT_3
R21	3393	DDE_1 DDE_3 HTH_33 rve
R199	3348	RNase_H RVT_1 RVT_3
R31	3326	Atrophin-1 Dimer_Tnp_hAT
R33	3195	Dimer_Tnp_hAT
R186	3166	Tymo_45kd_70kd rve
R48	3133	7TMR-DISM_7TM Acyl_transf_3 DUF2074 DUF4271 MIP-T3 O-ag_pol_Wzy PIG-U SMC_N Trichoplein YfhO
R18	3132	Dimer_Tnp_hAT
R234	3132	Dimer_Tnp_hAT
R396	3039	Ketoacyl-synt_C Thiolase_N ketoacyl-synt
R425	2979	Ank Ank_2 Ank_4 Ank_5 Dimer_Tnp_hAT UBN2 UBN2_2
R387	2975	ABC2_membrane ABC2_membrane_3 ABC_tran COX1
R99	2835	DUF1777 PRP38_assoc Trypan_PARP
R405	2732	p450
R90	2607	rve
R167	2520	AAA_16 HET NB-ARC TPR_10 TPR_12
R257	2354	AAA_16 AAA_22 DUF1513 Gmad1 Protamine_P2 WD40
R127	2277	RVT_2
R114	2261	RVT_2
R217	2196	AAA_16 Ank Ank_2 Ank_4 Ank_5 Gag_spuma NACHT
R200	2193	Aminotran_4
R96	2157	DUF2721
R159	2148	ATP-synt_B Borrelia_P83 DDE_1 DUF1682 DUF2058 DUF4207 HTH_Tnp_Tc5 MAP7 Nop53 Trichoplein
R13	2112	AAA_27 DDE_1 DUF1682 DUF4207 ERM HTH_Tnp_Tc5 MAP7 RIB43A SURF6 Trichoplein
R60	2107	DDE_3
R41	2104	Borrelia_P83 DDE_1 DUF827 HTH_Tnp_Tc5 SRP-alpha_N Trichoplein Troponin
R124	2101	Cgr1 DDE_1 DUF4355 HTH_Tnp_Tc5 MAP7 MIP-T3 Nop25 PP28 Radial_spoke_3 Trichoplein
R97	2100	Borrelia_P83 DDE_1 DUF3584 DUF4207 ERM HCR HTH_Tnp_Tc5 MAP7 PKK Trichoplein
R119	2091	rve
R117	2083	Cgr1 DDE_1 DUF4207 DUF572 DUF827 HTH_Tnp_Tc5 MAP7 Nop53 PKK Trichoplein
R168	2074	RVT_2
R255	2028	Acyl_transf_1 Ketoacyl-synt_C Thiolase_N ketoacyl-synt
R103	2026	Ank Ank_2 Ank_4 Ank_5 Atrophin-1 FUSC Gag_spuma Mating_C SerH Tymo_45kd_70kd
R268	2010	RVT_2 rve
R173	1888	UBN2 UBN2_2 gag_pre-integrs
R51	1877	DDE_1 HTH_psq
R6	1858	DDE_1 DDE_3 HTH_psq
R107	1856	DDE_1 DDE_3
R203	1840	Methyltransf_11 Methyltransf_18 Methyltransf_25 Methyltransf_26 Methyltransf_31
R94	1834	DDE_1 HTH_psq
R72	1824	DDE_1
R101	1818	DDE_1
R239	1808	RVT_2
R121	1788	DDE_1 HTH_Tnp_Tc5 HTH_psq
R171	1754	AMP-binding DUF4009 PP-binding
R407	1743	Acyl_transf_1
R210	1736	DDE_1 HTH_psq
R67	1525	DDE_3 HTH_29 HTH_Tnp_Tc3_2
R205	1517	Dimer_Tnp_hAT
R470	1476	ADH_N ADH_zinc_N ADH_zinc_N_2 KR adh_short
R390	1415	KR adh_short
R89	1403	RVT_2
R183	1309	RVT_2
R421	1294	MFS_1 MFS_2 TctB
R427	1291	DUF3505 Keratin_B2 SerH
R272	1290	DNA_pol_viral_N
R178	1288	RVT_2
R414	1236	Methyltransf_11 Methyltransf_12 Methyltransf_31
R463	1223	ABC2_membrane ABC2_membrane_3 PDR_CDR
R204	1153	Chromo
R412	1148	DEAD Helicase_C Tymo_45kd_70kd
R330	1141	rve
R278	1108	Dimer_Tnp_hAT
R279	1101	rve
R395	1066	DDE_1 DUF2058
R351	1062	DPPIV_N DUF1431 DUF1513 Gmad1 Keratin_B2 PQQ_2 WD40
R408	1047	ABC_tran
R189	1021	Retrotrans_gag
R438	981	Ketoacyl-synt_C ketoacyl-synt
R157	924	Dimer_Tnp_hAT
R316	894	RVT_2
R439	891	TPR_10 TPR_12
R280	888	Keratin_B2 SerH
R229	885	RVT_2
R111	870	Dimer_Tnp_hAT
R175	830	Dimer_Tnp_hAT
R176	812	Dimer_Tnp_hAT
R277	806	DDE_1 HTH_Tnp_Tc5
R254	805	RVT_2
R206	803	DDE_1 HTH_Tnp_Tc5 HTH_psq
R460	797	Ank_2
R393	774	LysM
R221	719	ATP-synt_B DDRGK DUF2968 DUF390 DUF4207 ERM MAP7 Metal_resist PspA_IM30 Trichoplein
R190	660	Corona_nucleoca
R269	647	HTH_29 HTH_32 HTH_Tnp_Tc3_2
R326	645	RVT_2
R141	638	DUF2968 DUF390 DUF4207 HCR HlyD MAP7 Myosin_tail_1 PspA_IM30 Rrp15p Trichoplein
R363	618	ABC2_membrane ABC2_membrane_3
R146	593	TPR_10 TPR_12 TT_ORF1
R243	570	Dimer_Tnp_hAT
R479	570	Adeno_PV Adeno_VII DUF1509 DUF1777 DUF3488 Ion_trans PRP38_assoc Protamine_P1 Protamine_P2 TT_ORF1
R512	567	DDE_1 DDE_3
R198	478	HTH_Tnp_Tc5
R357	473	HET
R327	422	Activator_LAG-3 Cast DUF2968 YscO
R526	389	DDE_1
R142	379	HoxA13_N TPR_10 TPR_11 TPR_12 TPR_16
R138	374	DUF1431 DUF1513 Gmad1 WD40
R447	323	APH Choline_kinase
R245	298	Dimer_Tnp_hAT
R341	298	HET
R424	296	DUF4271
R333	247	MFS_1
R488	210	MFS_1
R321	203	RVT_2
R487	200	zf-C2H2_2
R431	183	Ifi-6-16
R260	169	HET
R475	108	Tyrosinase
