# Supplementary material for: Comparative genomics of the wheat fungal pathogen Pyrenophora tritici-repentis reveals chromosomal variations and genome plasticity
Source: BMC Genomics. 2018 Apr 23;19:279. doi: 10.1186/s12864-018-4680-3 (PMC5913888; doi:10.1186/s12864-018-4680-3)
Supplement: Supplementary file 7 — RIPCAL2 summary for M4 RIP analysis. (XLSX 216 kb) [file 12864_2018_4680_MOESM7_ESM.xlsx]

## Sheet: ripcal2-clean-summary.txt
Repeat	02 total ca->ta	03 total ca<-ta	04 total ca<->ta	05 total cc->tc	06 total cc<-tc	07 total cc<->tc	08 total cg->tg	09 total cg<-tg	10 total cg<->tg	11 total ct->tt	12 total ct<-tt	13 total ct<->tt	14 avg match length	15 min match length	16 max match length	17 no. matches	18 avg match length >1kb	19 no. matches >1kb	20 avg match length <=1kb, >500bp	21 no. matches <=1kb, >500bp	22 avg match length <=500bp, >200bp	23 no. matches <=500bp, >200bp	24 avg match length <=200bp	25 no. matches <=200bp	26 dominance ca->ta	27 dominance ca<-ta	28 dominance ca<->ta	29 dominance cc->tc	30 dominance cc<-tc	31 dominance cc<->tc	32 dominance cg->tg	33 dominance cg<-tg	34 dominance cg<->tg	35 dominance ct->tt	36 dominance ct<-tt	37 dominance ct<->tt	38 dominance ca<->ta >1kb	39 dominance ca<->ta <=1kb, >500bp	40 dominance ca<->ta <=500bp, >200bp	41 dominance ca<->ta <=200	42 ca->ta / kb	43 ca<-ta / kb	44 ca<->ta / kb	45 cc->tc / kb	46 cc<-tc / kb	47 cc<->tc / kb	48 cg->tg / kb	49 cg<-tg / kb	50 cg<->tg / kb
r100	5	0	5	4	0	4	0	2	2	0	0	0	5912.6	5910	5916	5	5912.6	5	NA	0	NA	0	NA	0	1.25	0	0.833333	0.8	0	0.571429	0	NA	0.222222	0	0	0	0.833333	NA	NA	NA	0.16913	0	0.16913	0.135304	0	0.135304	0	0.0676521	0.0676521
r101	327	11	338	21	1	22	31	13	44	21	4	25	1797.38	1662	1817	8	1797.38	8	NA	0	NA	0	NA	0	4.47945	0.611111	3.71429	0.055409	0.0357143	0.0540541	0.0840108	0.8125	0.114286	0.055409	0.16	0.0618812	3.71429	NA	NA	NA	22.7415	0.765005	23.5065	1.46046	0.0695459	1.53001	2.15592	0.904096	3.06002
r102	2	4	6	1	0	1	13	6	19	0	0	0	160.909	160	161	11	NA	0	NA	0	NA	0	160.909	11	0.142857	0.666667	0.3	0.0666667	0	0.04	4.33333	1.5	2.71429	0	0	0	NA	NA	NA	0.3	1.12994	2.25989	3.38983	0.564972	0	0.564972	7.34463	3.38983	10.7345
r103	0	0	0	0	0	0	0	0	0	0	0	0	1927	1892	1984	3	1927	3	NA	0	NA	0	NA	0	NA	NA	NA	NA	NA	NA	NA	NA	NA	NA	NA	NA	NA	NA	NA	NA	0	0	0	0	0	0	0	0	0
r104	31	19	50	15	14	29	24	18	42	2	9	11	5872.36	5431	5928	11	5872.36	11	NA	0	NA	0	NA	0	0.756098	0.463415	0.609756	0.263158	0.304348	0.281553	0.5	0.428571	0.466667	0.0285714	0.176471	0.0909091	0.609756	NA	NA	NA	0.479906	0.294136	0.774042	0.232213	0.216732	0.448944	0.37154	0.278655	0.650195
r105	14	1	15	2	0	2	5	0	5	3	1	4	121.071	118	122	14	NA	0	NA	0	NA	0	121.071	14	1.4	1	1.36364	0.0909091	0	0.0833333	0.263158	0	0.238095	0.142857	1	0.181818	NA	NA	NA	1.36364	8.25959	0.589971	8.84956	1.17994	0	1.17994	2.94985	0	2.94985
r106	0	0	0	0	0	0	0	0	0	0	0	0	142	142	142	3	NA	0	NA	0	NA	0	142	3	NA	NA	NA	NA	NA	NA	NA	NA	NA	NA	NA	NA	NA	NA	NA	NA	0	0	0	0	0	0	0	0	0
r107	272	237	509	52	33	85	126	104	230	117	36	153	1764.89	1671	1855	19	1764.89	19	NA	0	NA	0	NA	0	0.922034	1.36994	1.08761	0.100971	0.0875332	0.0952915	0.285714	0.339869	0.307898	0.26	0.0962567	0.18568	1.08761	NA	NA	NA	8.11141	7.06766	15.1791	1.55071	0.984105	2.53482	3.75749	3.10142	6.85892
r108	10	0	10	20	6	26	12	1	13	0	1	1	64.3636	61	68	11	NA	0	NA	0	NA	0	64.3636	11	0.3125	0	0.25	0.909091	3	1.08333	0.4	0.142857	0.351351	0	0.142857	0.0204082	NA	NA	NA	0.25	14.1243	0	14.1243	28.2486	8.47458	36.7232	16.9492	1.41243	18.3616
r109	31	25	56	24	12	36	31	34	65	31	25	56	358.5	354	364	6	NA	0	NA	0	358.5	6	NA	0	0.360465	0.352113	0.356688	0.258065	0.142857	0.20339	0.360465	0.548387	0.439189	0.360465	0.352113	0.356688	NA	NA	0.356688	NA	14.4119	11.6225	26.0344	11.1576	5.5788	16.7364	14.4119	15.8066	30.2185
r10	0	0	0	0	0	0	0	0	0	0	0	0	10542	10541	10543	2	10542	2	NA	0	NA	0	NA	0	NA	NA	NA	NA	NA	NA	NA	NA	NA	NA	NA	NA	NA	NA	NA	NA	0	0	0	0	0	0	0	0	0
r110	17	16	33	10	7	17	20	10	30	10	9	19	506	488	519	3	NA	0	515	2	488	1	NA	0	0.425	0.615385	0.5	0.212766	0.2	0.207317	0.540541	0.3125	0.434783	0.212766	0.272727	0.2375	NA	0.558824	0.4375	NA	11.1989	10.5402	21.7391	6.58762	4.61133	11.1989	13.1752	6.58762	19.7628
r111	95	0	95	2	0	2	9	2	11	5	2	7	866.25	858	869	4	NA	0	866.25	4	NA	0	NA	0	5.9375	0	4.75	0.0183486	0	0.0176991	0.0882353	1	0.105769	0.0471698	1	0.0648148	NA	4.75	NA	NA	27.417	0	27.417	0.577201	0	0.577201	2.5974	0.577201	3.1746
r112	14	5	19	7	0	7	1	5	6	6	1	7	7773.88	7583	7806	8	7773.88	8	NA	0	NA	0	NA	0	1	0.833333	0.95	0.333333	0	0.21875	0.037037	0.833333	0.181818	0.272727	0.1	0.21875	0.95	NA	NA	NA	0.225113	0.0803975	0.30551	0.112556	0	0.112556	0.0160795	0.0803975	0.096477
r113	12	0	12	0	0	0	0	0	0	24	2	26	265.143	260	266	7	NA	0	NA	0	265.143	7	NA	0	0.5	0	0.461538	0	0	0	0	0	0	2	NA	2.16667	NA	NA	0.461538	NA	6.46552	0	6.46552	0	0	0	0	0	0
r114	107	43	150	15	16	31	45	33	78	29	41	70	2234.33	2139	2258	6	2234.33	6	NA	0	NA	0	NA	0	1.20225	0.477778	0.837989	0.0828729	0.136752	0.104027	0.298013	0.33	0.310757	0.173653	0.445652	0.27027	0.837989	NA	NA	NA	7.9815	3.20752	11.189	1.1189	1.1935	2.3124	3.35671	2.46158	5.81829
r115	6	1	7	12	9	21	7	5	12	1	3	4	122	113	128	6	NA	0	NA	0	NA	0	122	6	0.3	0.0588235	0.189189	0.857143	1	0.913043	0.368421	0.384615	0.375	0.04	0.2	0.1	NA	NA	NA	0.189189	8.19672	1.36612	9.56284	16.3934	12.2951	28.6885	9.56284	6.8306	16.3934
r116	0	0	0	16	0	16	33	0	33	0	0	0	378.095	376	379	21	NA	0	NA	0	378.095	21	NA	0	0	NA	0	0.484848	NA	0.484848	2.0625	NA	2.0625	0	NA	0	NA	NA	0	NA	0	0	0	2.01511	0	2.01511	4.15617	0	4.15617
r117	70	21	91	8	6	14	14	1	15	12	12	24	1893	1892	1896	5	1893	5	NA	0	NA	0	NA	0	2.05882	1.10526	1.71698	0.0833333	0.176471	0.107692	0.155556	0.025641	0.116279	0.130435	0.428571	0.2	1.71698	NA	NA	NA	7.39567	2.2187	9.61437	0.845219	0.633914	1.47913	1.47913	0.105652	1.58479
r118	15	9	24	7	1	8	3	5	8	0	4	4	240.8	239	244	5	NA	0	NA	0	240.8	5	NA	0	1.5	0.9	1.2	0.388889	0.0555556	0.222222	0.136364	0.357143	0.222222	0	0.266667	0.1	NA	NA	1.2	NA	12.4585	7.47508	19.9336	5.81395	0.830565	6.64452	2.49169	4.15282	6.64452
r119	36	33	69	14	19	33	19	20	39	17	3	20	2083	2072	2090	6	2083	6	NA	0	NA	0	NA	0	0.72	0.785714	0.75	0.194444	0.339286	0.257812	0.283582	0.363636	0.319672	0.246377	0.0416667	0.141844	0.75	NA	NA	NA	2.88046	2.64042	5.52088	1.12018	1.52024	2.64042	1.52024	1.60026	3.1205
r11	0	0	0	0	0	0	0	0	0	0	0	0	NA	Seq_Length	0	NA	0	NA	0	NA	0	NA	0	NA	NA	NA	NA	NA	NA	NA	NA	NA	NA	NA	NA	NA	NA	NA	NA	NA	NA	NA	NA	NA	NA	NA	NA	NA	NA
r120	2	8	10	7	0	7	1	1	2	6	7	13	60.7778	56	68	9	NA	0	NA	0	NA	0	60.7778	9	0.142857	1	0.454545	0.777778	0	0.28	0.0666667	0.0666667	0.0666667	0.6	0.777778	0.684211	NA	NA	NA	0.454545	3.65631	14.6252	18.2815	12.7971	0	12.7971	1.82815	1.82815	3.65631
r121	107	19	126	6	6	12	15	8	23	6	5	11	1764.4	1674	1787	5	1764.4	5	NA	0	NA	0	NA	0	3.96296	1	2.73913	0.046875	0.1875	0.075	0.12605	0.266667	0.154362	0.046875	0.151515	0.068323	2.73913	NA	NA	NA	12.1288	2.15371	14.2825	0.680118	0.680118	1.36024	1.70029	0.906824	2.60712
r122	15	0	15	27	1	28	12	2	14	2	0	2	188.7	175	193	10	NA	0	NA	0	NA	0	188.7	10	0.365854	0	0.340909	0.931034	0.5	0.903226	0.272727	2	0.311111	0.037037	0	0.0350877	NA	NA	NA	0.340909	7.94913	0	7.94913	14.3084	0.529942	14.8384	6.3593	1.05988	7.41918
r123	25	1	26	0	2	2	7	5	12	5	0	5	183.917	175	186	12	NA	0	NA	0	NA	0	183.917	12	2.08333	0.142857	1.36842	0	0.333333	0.0465116	0.233333	1.66667	0.363636	0.15625	0	0.125	NA	NA	NA	1.36842	11.3276	0.453104	11.7807	0	0.906208	0.906208	3.17173	2.26552	5.43725
r124	29	6	35	2	1	3	1	0	1	2	3	5	2066.17	1899	2100	6	2066.17	6	NA	0	NA	0	NA	0	5.8	1.5	3.88889	0.0625	0.111111	0.0731707	0.030303	0	0.0232558	0.0625	0.428571	0.128205	3.88889	NA	NA	NA	2.33928	0.483988	2.82326	0.161329	0.0806647	0.241994	0.0806647	0	0.0806647
r125	18	2	20	0	6	6	7	5	12	0	2	2	241.857	229	246	7	NA	0	NA	0	241.857	7	NA	0	2.57143	0.153846	1	0	0.666667	0.176471	0.388889	0.5	0.428571	0	0.153846	0.0526316	NA	NA	1	NA	10.632	1.18133	11.8133	0	3.544	3.544	4.13467	2.95334	7.08801
r126	0	0	0	0	0	0	0	0	0	0	0	0	NA	Seq_Length	0	NA	0	NA	0	NA	0	NA	0	NA	NA	NA	NA	NA	NA	NA	NA	NA	NA	NA	NA	NA	NA	NA	NA	NA	NA	NA	NA	NA	NA	NA	NA	NA	NA
r127	3	4	7	0	1	1	4	3	7	2	1	3	2271	2266	2276	2	2271	2	NA	0	NA	0	NA	0	0.5	0.8	0.636364	0	0.125	0.0588235	0.8	0.5	0.636364	0.285714	0.125	0.2	0.636364	NA	NA	NA	0.660502	0.880669	1.54117	0	0.220167	0.220167	0.880669	0.660502	1.54117
r128	10	12	22	2	6	8	7	1	8	12	4	16	1217	1209	1221	4	1217	4	NA	0	NA	0	NA	0	0.47619	1.09091	0.6875	0.0689655	0.352941	0.173913	0.291667	0.0454545	0.173913	0.631579	0.210526	0.421053	0.6875	NA	NA	NA	2.05423	2.46508	4.51931	0.410846	1.23254	1.64339	1.43796	0.205423	1.64339
r129	0	0	0	5	0	5	0	0	0	1	0	1	194	194	194	8	NA	0	NA	0	NA	0	194	8	0	NA	0	5	NA	5	0	NA	0	0.2	NA	0.2	NA	NA	NA	0	0	0	0	3.22165	0	3.22165	0	0	0
r12	0	0	0	0	0	0	0	0	0	0	0	0	NA	Seq_Length	0	NA	0	NA	0	NA	0	NA	0	NA	NA	NA	NA	NA	NA	NA	NA	NA	NA	NA	NA	NA	NA	NA	NA	NA	NA	NA	NA	NA	NA	NA	NA	NA	NA
r130	17	14	31	9	6	15	9	2	11	12	4	16	5294.33	5293	5295	3	5294.33	3	NA	0	NA	0	NA	0	0.566667	1.16667	0.738095	0.236842	0.3	0.258621	0.236842	0.0833333	0.177419	0.342857	0.181818	0.280702	0.738095	NA	NA	NA	1.07033	0.881446	1.95177	0.566644	0.377762	0.944406	0.566644	0.125921	0.692564
r131	88	20	108	13	11	24	39	22	61	11	9	20	1317.14	1309	1327	7	1317.14	7	NA	0	NA	0	NA	0	1.39683	0.47619	1.02857	0.0942029	0.215686	0.126984	0.348214	0.55	0.401316	0.0785714	0.169811	0.103627	1.02857	NA	NA	NA	9.54447	2.1692	11.7137	1.40998	1.19306	2.60304	4.22993	2.38612	6.61605
r132	9	1	10	7	2	9	3	0	3	2	0	2	106.7	102	109	10	NA	0	NA	0	NA	0	106.7	10	0.75	0.5	0.714286	0.5	2	0.6	0.166667	0	0.142857	0.105263	0	0.0909091	NA	NA	NA	0.714286	8.43486	0.937207	9.37207	6.56045	1.87441	8.43486	2.81162	0	2.81162
r133	0	1	1	0	1	1	2	0	2	2	6	8	65.0833	62	68	12	NA	0	NA	0	NA	0	65.0833	12	0	0.142857	0.0909091	0	0.142857	0.0909091	1	0	0.2	1	3	2	NA	NA	NA	0.0909091	0	1.28041	1.28041	0	1.28041	1.28041	2.56082	0	2.56082
r134	16	17	33	9	7	16	14	12	26	10	11	21	1729.75	1723	1733	4	1729.75	4	NA	0	NA	0	NA	0	0.484848	0.566667	0.52381	0.225	0.175	0.2	0.4	0.342857	0.371429	0.25641	0.305556	0.28	0.52381	NA	NA	NA	2.31247	2.457	4.76948	1.30077	1.01171	2.31247	2.02341	1.73435	3.75777
r135	25	37	62	3	23	26	30	1	31	4	1	5	174.857	169	177	21	NA	0	NA	0	NA	0	174.857	21	0.675676	1.48	1	0.0508475	0.589744	0.265306	0.9375	0.0163934	0.333333	0.0689655	0.0163934	0.0420168	NA	NA	NA	1	6.80828	10.0763	16.8845	0.816993	6.26362	7.08061	8.16993	0.272331	8.44227
r136	15	15	30	3	0	3	8	1	9	3	0	3	166.667	164	167	9	NA	0	NA	0	NA	0	166.667	9	1.07143	15	2	0.115385	0	0.0714286	0.380952	0.0666667	0.25	0.115385	0	0.0714286	NA	NA	NA	2	10	10	20	2	0	2	5.33333	0.666667	6
r137	34	38	72	39	33	72	58	38	96	53	27	80	6627.14	6274	6713	7	6627.14	7	NA	0	NA	0	NA	0	0.226667	0.387755	0.290323	0.268966	0.320388	0.290323	0.460317	0.387755	0.428571	0.40458	0.247706	0.333333	0.290323	NA	NA	NA	0.732917	0.819142	1.55206	0.840698	0.71136	1.55206	1.25027	0.819142	2.06941
r138	109	40	149	49	13	62	117	67	184	56	18	74	368.4	335	373	25	NA	0	NA	0	368.4	25	NA	0	0.490991	0.408163	0.465625	0.173759	0.104	0.152334	0.546729	0.943662	0.645614	0.203636	0.15	0.187342	NA	NA	0.465625	NA	11.835	4.34311	16.1781	5.3203	1.41151	6.73181	12.7036	7.2747	19.9783
r139	20	5	25	5	2	7	4	10	14	9	6	15	228	215	233	4	NA	0	NA	0	228	4	NA	0	1.11111	0.277778	0.694444	0.151515	0.0952381	0.12963	0.117647	0.769231	0.297872	0.310345	0.352941	0.326087	NA	NA	0.694444	NA	21.9298	5.48246	27.4123	5.48246	2.19298	7.67544	4.38596	10.9649	15.3509
r13	2	0	2	29	4	33	1	0	1	0	0	0	2068.77	1914	2110	30	2068.77	30	NA	0	NA	0	NA	0	0.0666667	0	0.0588235	9.66667	NA	11	0.0322581	0	0.0285714	0	0	0	0.0588235	NA	NA	NA	0.0322253	0	0.0322253	0.467267	0.0644506	0.531718	0.0161127	0	0.0161127
r140	27	1	28	0	0	0	8	5	13	3	0	3	205.5	189	211	6	NA	0	NA	0	208.8	5	189	1	2.45455	0.2	1.75	0	0	0	0.266667	5	0.419355	0.0857143	0	0.0731707	NA	NA	1.61538	2.33333	21.8978	0.81103	22.7088	0	0	0	6.48824	4.05515	10.5434
r141	49	26	75	15	16	31	5	23	28	19	28	47	609.4	584	638	5	NA	0	609.4	5	NA	0	NA	0	1.25641	0.38806	0.707547	0.205479	0.207792	0.206667	0.060241	0.328571	0.183007	0.275362	0.430769	0.350746	NA	0.707547	NA	NA	16.0814	8.53298	24.6144	4.92287	5.25107	10.1739	1.64096	7.54841	9.18937
r142	11	15	26	49	35	84	15	11	26	26	0	26	374.81	349	378	21	NA	0	NA	0	374.81	21	NA	0	0.122222	0.326087	0.191176	0.942308	1.34615	1.07692	0.174419	0.22	0.191176	0.346667	0	0.191176	NA	NA	0.191176	NA	1.39754	1.90573	3.30327	6.22538	4.4467	10.6721	1.90573	1.39754	3.30327
r143	325	2	327	6	3	9	28	7	35	19	17	36	977.714	955	991	7	NA	0	977.714	7	NA	0	NA	0	6.13208	0.0740741	4.0875	0.016129	0.115385	0.0226131	0.08	0.318182	0.094086	0.0529248	1.41667	0.097035	NA	4.0875	NA	NA	47.4868	0.292227	47.7791	0.87668	0.43834	1.31502	4.09117	1.02279	5.11397
r144	41	1	42	0	1	1	1	2	3	3	6	9	243.25	226	252	8	NA	0	NA	0	243.25	8	NA	0	10.25	0.111111	3.23077	0	0.111111	0.0185185	0.0227273	0.25	0.0576923	0.0714286	1.5	0.195652	NA	NA	3.23077	NA	21.0689	0.513875	21.5827	0	0.513875	0.513875	0.513875	1.02775	1.54162
r145	0	0	0	0	0	0	0	0	0	0	0	0	74.25	72	77	4	NA	0	NA	0	NA	0	74.25	4	NA	NA	NA	NA	NA	NA	NA	NA	NA	NA	NA	NA	NA	NA	NA	NA	0	0	0	0	0	0	0	0	0
r146	111	40	151	68	22	90	66	38	104	8	4	12	580.154	548	588	13	NA	0	580.154	13	NA	0	NA	0	0.78169	0.625	0.73301	0.367568	0.268293	0.337079	0.352941	0.575758	0.411067	0.0326531	0.04	0.0347826	NA	0.73301	NA	NA	14.7176	5.30363	20.0212	9.01618	2.917	11.9332	8.75099	5.03845	13.7894
r147	0	0	0	4	0	4	4	0	4	0	0	0	6989.6	6964	6998	5	6989.6	5	NA	0	NA	0	NA	0	0	NA	0	1	NA	1	1	NA	1	0	NA	0	0	NA	NA	NA	0	0	0	0.114456	0	0.114456	0.114456	0	0.114456
r148	16	10	26	5	2	7	6	5	11	7	0	7	251.857	235	259	7	NA	0	NA	0	251.857	7	NA	0	0.888889	1.42857	1.04	0.172414	0.133333	0.159091	0.214286	0.416667	0.275	0.259259	0	0.159091	NA	NA	1.04	NA	9.07544	5.67215	14.7476	2.83607	1.13443	3.9705	3.40329	2.83607	6.23936
r149	99	9	108	3	0	3	9	0	9	0	3	3	1682.75	1682	1683	4	1682.75	4	NA	0	NA	0	NA	0	8.25	3	7.2	0.0277778	0	0.025	0.0882353	0	0.0789474	0	0.333333	0.025	7.2	NA	NA	NA	14.7081	1.3371	16.0452	0.445699	0	0.445699	1.3371	0	1.3371
r14	0	0	0	0	0	0	0	0	0	0	0	0	NA	Seq_Length	0	NA	0	NA	0	NA	0	NA	0	NA	NA	NA	NA	NA	NA	NA	NA	NA	NA	NA	NA	NA	NA	NA	NA	NA	NA	NA	NA	NA	NA	NA	NA	NA	NA
r150	2	2	4	5	1	6	28	5	33	2	3	5	74.9	70	77	10	NA	0	NA	0	NA	0	74.9	10	0.0571429	0.222222	0.0909091	0.15625	0.1	0.142857	3.11111	0.833333	2.2	0.0571429	0.375	0.116279	NA	NA	NA	0.0909091	2.67023	2.67023	5.34045	6.67557	1.33511	8.01068	37.3832	6.67557	44.0587
r151	20	3	23	14	6	20	7	18	25	11	5	16	273.571	271	274	7	NA	0	NA	0	273.571	7	NA	0	0.625	0.103448	0.377049	0.368421	0.230769	0.3125	0.155556	1.28571	0.423729	0.268293	0.185185	0.235294	NA	NA	0.377049	NA	10.4439	1.56658	12.0104	7.3107	3.13316	10.4439	3.65535	9.39948	13.0548
r152	11	5	16	5	13	18	0	4	4	11	13	24	144.571	139	149	7	NA	0	NA	0	NA	0	144.571	7	0.6875	0.166667	0.347826	0.227273	0.590909	0.409091	0	0.129032	0.0689655	0.6875	0.590909	0.631579	NA	NA	NA	0.347826	10.8696	4.94071	15.8103	4.94071	12.8458	17.7866	0	3.95257	3.95257
r153	0	0	0	0	0	0	0	0	0	0	0	0	125	125	125	5	NA	0	NA	0	NA	0	125	5	NA	NA	NA	NA	NA	NA	NA	NA	NA	NA	NA	NA	NA	NA	NA	NA	0	0	0	0	0	0	0	0	0
r154	100	61	161	17	19	36	73	9	82	22	26	48	5186.94	4780	5245	18	5186.94	18	NA	0	NA	0	NA	0	0.892857	1.12963	0.96988	0.0871795	0.197917	0.123711	0.52518	0.0849057	0.334694	0.115789	0.292135	0.172043	0.96988	NA	NA	NA	1.07107	0.65335	1.72441	0.182081	0.203502	0.385583	0.781878	0.0963959	0.878273
r155	277	563	840	0	66	66	314	0	314	449	213	662	194.783	117	256	295	NA	0	NA	0	254.545	156	127.712	139	0.363041	2.01792	0.806142	0	0.0850515	0.0363436	0.432507	0	0.200255	0.759729	0.338633	0.542623	NA	NA	0.385827	1.20599	4.82066	9.79795	14.6186	0	1.14861	1.14861	5.46458	0	5.46458
r156	9	0	9	0	0	0	8	0	8	1	0	1	186.4	186	188	5	NA	0	NA	0	NA	0	186.4	5	1	NA	1	0	NA	0	0.8	NA	0.8	0.0588235	NA	0.0588235	NA	NA	NA	1	9.65665	0	9.65665	0	0	0	8.58369	0	8.58369
r157	29	11	40	2	2	4	9	0	9	0	0	0	923	923	923	4	NA	0	923	4	NA	0	NA	0	2.63636	5.5	3.07692	0.0526316	0.181818	0.0816327	0.290323	0	0.204545	0	0	0	NA	3.07692	NA	NA	7.85482	2.97941	10.8342	0.541712	0.541712	1.08342	2.4377	0	2.4377
r158	1	0	1	0	0	0	0	0	0	0	0	0	89	89	89	4	NA	0	NA	0	NA	0	89	4	NA	NA	NA	0	NA	0	0	NA	0	0	NA	0	NA	NA	NA	NA	2.80899	0	2.80899	0	0	0	0	0	0
r159	135	55	190	10	3	13	28	31	59	11	14	25	2138.75	2116	2147	4	2138.75	4	NA	0	NA	0	NA	0	2.7551	1.14583	1.95876	0.0574713	0.03	0.0474453	0.179487	0.430556	0.258772	0.0635838	0.157303	0.0954198	1.95876	NA	NA	NA	15.7802	6.42899	22.2092	1.16891	0.350672	1.51958	3.27294	3.62361	6.89655
r15	0	0	0	4	0	4	0	2	2	0	1	1	19496.2	18651	20017	6	19496.2	6	NA	0	NA	0	NA	0	0	0	0	NA	0	1.33333	0	2	0.4	0	0.5	0.166667	0	NA	NA	NA	0	0	0	0.0341948	0	0.0341948	0	0.0170974	0.0170974
r160	0	0	0	0	0	0	0	0	0	0	0	0	65	65	65	2	NA	0	NA	0	NA	0	65	2	NA	NA	NA	NA	NA	NA	NA	NA	NA	NA	NA	NA	NA	NA	NA	NA	0	0	0	0	0	0	0	0	0
r161	0	0	0	0	0	0	0	0	0	0	0	0	854.5	851	856	4	NA	0	854.5	4	NA	0	NA	0	NA	NA	NA	NA	NA	NA	NA	NA	NA	NA	NA	NA	NA	NA	NA	NA	0	0	0	0	0	0	0	0	0
r162	5	0	5	3	0	3	4	4	8	5	0	5	115.333	107	120	6	NA	0	NA	0	NA	0	115.333	6	0.416667	0	0.3125	0.214286	0	0.166667	0.307692	NA	0.615385	0.416667	0	0.3125	NA	NA	NA	0.3125	7.22543	0	7.22543	4.33526	0	4.33526	5.78035	5.78035	11.5607
r163	2	0	2	0	0	0	4	0	4	2	0	2	159.625	156	161	8	NA	0	NA	0	NA	0	159.625	8	0.333333	NA	0.333333	0	NA	0	1	NA	1	0.333333	NA	0.333333	NA	NA	NA	0.333333	1.56617	0	1.56617	0	0	0	3.13234	0	3.13234
r164	10	0	10	0	0	0	0	10	10	0	0	0	253	246	256	8	NA	0	NA	0	253	8	NA	0	NA	0	1	0	0	0	0	NA	1	0	0	0	NA	NA	1	NA	4.94071	0	4.94071	0	0	0	0	4.94071	4.94071
r165	2	0	2	1	0	1	0	0	0	0	0	0	162.5	155	164	6	NA	0	NA	0	NA	0	162.5	6	2	NA	2	0.5	NA	0.5	0	NA	0	0	NA	0	NA	NA	NA	2	2.05128	0	2.05128	1.02564	0	1.02564	0	0	0
r166	0	0	0	0	0	0	0	0	0	0	0	0	255	255	255	7	NA	0	NA	0	255	7	NA	0	NA	NA	NA	NA	NA	NA	NA	NA	NA	NA	NA	NA	NA	NA	NA	NA	0	0	0	0	0	0	0	0	0
r167	90	106	196	47	55	102	126	83	209	71	72	143	2473.25	2354	2519	4	2473.25	4	NA	0	NA	0	NA	0	0.368852	0.504762	0.431718	0.163763	0.210728	0.186131	0.605769	0.356223	0.473923	0.269962	0.295082	0.282051	0.431718	NA	NA	NA	9.09734	10.7146	19.812	4.75083	5.55949	10.3103	12.7363	8.38977	21.126
r168	44	47	91	26	18	44	25	22	47	15	8	23	2072	2069	2073	4	2072	4	NA	0	NA	0	NA	0	0.666667	0.979167	0.798246	0.309524	0.233766	0.273292	0.294118	0.30137	0.297468	0.157895	0.091954	0.126374	0.798246	NA	NA	NA	5.30888	5.67085	10.9797	3.13707	2.17181	5.30888	3.01641	2.65444	5.67085
r169	74	2	76	7	1	8	11	5	16	3	0	3	2605.75	2588	2617	4	2605.75	4	NA	0	NA	0	NA	0	3.52381	0.333333	2.81481	0.0795455	0.142857	0.0842105	0.130952	1.66667	0.183908	0.0326087	0	0.03	2.81481	NA	NA	NA	7.09968	0.191883	7.29157	0.671592	0.0959417	0.767533	1.05536	0.479708	1.53507
r16	478	100	578	184	80	264	303	53	356	134	46	180	108.511	96	120	141	NA	0	NA	0	NA	0	108.511	141	0.769726	0.558659	0.7225	0.201093	0.40201	0.236984	0.380653	0.234513	0.348337	0.13886	0.197425	0.15025	NA	NA	NA	0.7225	31.2418	6.53595	37.7778	12.0261	5.22876	17.2549	19.8039	3.46405	23.268
r170	3	0	3	3	0	3	0	0	0	1	0	1	94.4	93	97	5	NA	0	NA	0	NA	0	94.4	5	0.75	NA	0.75	0.75	NA	0.75	0	NA	0	0.166667	NA	0.166667	NA	NA	NA	0.75	6.35593	0	6.35593	6.35593	0	6.35593	0	0	0
r171	60	18	78	34	12	46	44	29	73	36	28	64	1739	1725	1766	3	1739	3	NA	0	NA	0	NA	0	0.526316	0.26087	0.42623	0.242857	0.16	0.213953	0.338462	0.5	0.388298	0.26087	0.474576	0.324873	0.42623	NA	NA	NA	11.5009	3.45026	14.9511	6.51716	2.30017	8.81733	8.43397	5.55875	13.9927
r172	9	0	9	0	0	0	1	0	1	0	0	0	356.75	350	359	4	NA	0	NA	0	356.75	4	NA	0	9	NA	9	0	NA	0	0.111111	NA	0.111111	0	NA	0	NA	NA	9	NA	6.30694	0	6.30694	0	0	0	0.700771	0	0.700771
r173	16	14	30	6	4	10	10	7	17	6	0	6	1884.67	1880	1887	3	1884.67	3	NA	0	NA	0	NA	0	0.727273	1.27273	0.909091	0.1875	0.190476	0.188679	0.357143	0.388889	0.369565	0.1875	0	0.105263	0.909091	NA	NA	NA	2.82985	2.47612	5.30598	1.0612	0.707464	1.76866	1.76866	1.23806	3.00672
r174	54	12	66	1	10	11	3	3	6	8	2	10	808	752	821	7	NA	0	808	7	NA	0	NA	0	4.5	0.8	2.44444	0.0153846	0.588235	0.134146	0.047619	0.125	0.0689655	0.137931	0.08	0.120482	NA	2.44444	NA	NA	9.54738	2.12164	11.669	0.176803	1.76803	1.94484	0.53041	0.53041	1.06082
r175	9	0	9	0	3	3	3	0	3	3	3	6	828.25	826	829	4	NA	0	828.25	4	NA	0	NA	0	1.5	0	0.75	0	1	0.166667	0.25	0	0.166667	0.25	1	0.4	NA	0.75	NA	NA	2.71657	0	2.71657	0	0.905524	0.905524	0.905524	0	0.905524
r176	62	18	80	8	1	9	17	19	36	11	6	17	810.5	809	811	4	NA	0	810.5	4	NA	0	NA	0	1.72222	0.692308	1.29032	0.0888889	0.0232558	0.0676692	0.209877	0.76	0.339623	0.126437	0.157895	0.136	NA	1.29032	NA	NA	19.124	5.55213	24.6761	2.46761	0.308452	2.77606	5.24368	5.86058	11.1043
r177	2	0	2	5	0	5	2	3	5	3	3	6	4655.5	4654	4656	4	4655.5	4	NA	0	NA	0	NA	0	0.2	0	0.125	0.714286	0	0.384615	0.2	1	0.384615	0.333333	1	0.5	0.125	NA	NA	NA	0.1074	0	0.1074	0.2685	0	0.2685	0.1074	0.1611	0.2685
r178	4	4	8	1	0	1	1	1	2	1	0	1	1286.67	1286	1287	3	1286.67	3	NA	0	NA	0	NA	0	1.33333	4	2	0.166667	0	0.0909091	0.166667	0.25	0.2	0.166667	0	0.0909091	2	NA	NA	NA	1.03627	1.03627	2.07254	0.259067	0	0.259067	0.259067	0.259067	0.518135
r179	0	0	0	76	7	83	13	0	13	0	0	0	79.0938	72	80	32	NA	0	NA	0	NA	0	79.0938	32	0	0	0	5.84615	NA	6.38462	0.171053	0	0.156627	0	0	0	NA	NA	NA	0	0	0	0	30.0277	2.76571	32.7934	5.13631	0	5.13631
r17	0	0	0	0	0	0	0	0	0	0	0	0	NA	Seq_Length	0	NA	0	NA	0	NA	0	NA	0	NA	NA	NA	NA	NA	NA	NA	NA	NA	NA	NA	NA	NA	NA	NA	NA	NA	NA	NA	NA	NA	NA	NA	NA	NA	NA
r180	1	1	2	3	1	4	0	2	2	0	1	1	160.667	160	161	6	NA	0	NA	0	NA	0	160.667	6	0.333333	0.25	0.285714	3	0.25	0.8	0	0.666667	0.285714	0	0.25	0.125	NA	NA	NA	0.285714	1.03734	1.03734	2.07469	3.11203	1.03734	4.14938	0	2.07469	2.07469
r181	37	45	82	5	2	7	21	14	35	6	3	9	453	415	473	8	NA	0	NA	0	453	8	NA	0	1.15625	2.36842	1.60784	0.078125	0.0322581	0.0555556	0.4375	0.28	0.357143	0.0952381	0.0491803	0.0725806	NA	NA	1.60784	NA	10.2097	12.4172	22.6269	1.37969	0.551876	1.93157	5.7947	3.86313	9.65784
r182	0	0	0	1	0	1	0	0	0	0	0	0	453	453	453	4	NA	0	NA	0	453	4	NA	0	0	NA	0	NA	NA	NA	0	NA	0	0	NA	0	NA	NA	0	NA	0	0	0	0.551876	0	0.551876	0	0	0
r183	2	2	4	0	0	0	0	0	0	0	0	0	1298.75	1289	1308	4	1298.75	4	NA	0	NA	0	NA	0	NA	NA	NA	0	0	0	0	0	0	0	0	0	NA	NA	NA	NA	0.384986	0.384986	0.769971	0	0	0	0	0	0
r184	3	0	3	0	0	0	4	1	5	0	0	0	94	94	94	5	NA	0	NA	0	NA	0	94	5	0.75	0	0.6	0	0	0	1.33333	NA	1.66667	0	0	0	NA	NA	NA	0.6	6.38298	0	6.38298	0	0	0	8.51064	2.12766	10.6383
r185	41	2	43	1	0	1	6	2	8	4	0	4	361.333	357	364	3	NA	0	NA	0	361.333	3	NA	0	3.72727	1	3.30769	0.0196078	0	0.0181818	0.130435	1	0.166667	0.0833333	0	0.0769231	NA	NA	3.30769	NA	37.8229	1.84502	39.6679	0.922509	0	0.922509	5.53506	1.84502	7.38007
r186	4	1	5	0	1	1	3	0	3	0	0	0	3165	3165	3165	3	3165	3	NA	0	NA	0	NA	0	1.33333	1	1.25	0	1	0.125	0.75	0	0.5	0	0	0	1.25	NA	NA	NA	0.421274	0.105319	0.526593	0	0.105319	0.105319	0.315956	0	0.315956
r187	9	19	28	13	8	21	13	11	24	6	1	7	136.444	131	139	9	NA	0	NA	0	NA	0	136.444	9	0.28125	0.95	0.538462	0.464286	0.258065	0.355932	0.464286	0.392857	0.428571	0.171429	0.0263158	0.0958904	NA	NA	NA	0.538462	7.32899	15.4723	22.8013	10.5863	6.51466	17.101	10.5863	8.95765	19.544
r188	24	23	47	7	5	12	10	10	20	6	11	17	2078	2074	2080	3	2078	3	NA	0	NA	0	NA	0	1.04348	0.884615	0.959184	0.175	0.113636	0.142857	0.27027	0.25641	0.263158	0.146341	0.289474	0.21519	0.959184	NA	NA	NA	3.84986	3.68944	7.5393	1.12287	0.802053	1.92493	1.60411	1.60411	3.20821
r189	0	0	0	0	0	0	0	0	0	0	0	0	1019.4	1018	1020	5	1019.4	5	NA	0	NA	0	NA	0	NA	NA	NA	NA	NA	NA	NA	NA	NA	NA	NA	NA	NA	NA	NA	NA	0	0	0	0	0	0	0	0	0
r18	38	0	38	2	0	2	0	1	1	0	5	5	3110.69	2852	3131	42	3110.69	42	NA	0	NA	0	NA	0	19	0	4.75	0.0526316	0	0.0454545	0	0.2	0.0222222	0	5	0.121951	4.75	NA	NA	NA	0.290856	0	0.290856	0.0153082	0	0.0153082	0	0.0076541	0.0076541
r190	0	0	0	0	0	0	0	0	0	0	0	0	658.8	658	660	5	NA	0	658.8	5	NA	0	NA	0	NA	NA	NA	NA	NA	NA	NA	NA	NA	NA	NA	NA	NA	NA	NA	NA	0	0	0	0	0	0	0	0	0
r191	47	19	66	7	5	12	7	7	14	35	28	63	361	344	374	8	NA	0	NA	0	361	8	NA	0	0.959184	0.475	0.741573	0.0786517	0.0925926	0.0839161	0.0786517	0.134615	0.0992908	0.57377	0.903226	0.684783	NA	NA	0.741573	NA	16.2742	6.57895	22.8532	2.42382	1.7313	4.15512	2.42382	2.42382	4.84765
r192	11	21	32	4	2	6	14	6	20	4	4	8	97.75	91	104	8	NA	0	NA	0	NA	0	97.75	8	0.5	1.75	0.941176	0.137931	0.0645161	0.1	0.736842	0.222222	0.434783	0.137931	0.137931	0.137931	NA	NA	NA	0.941176	14.0665	26.8542	40.9207	5.11509	2.55754	7.67263	17.9028	7.67263	25.5754
r193	25	22	47	7	10	17	14	11	25	9	14	23	453.75	447	460	4	NA	0	NA	0	453.75	4	NA	0	0.833333	0.628571	0.723077	0.145833	0.212766	0.178947	0.341463	0.23913	0.287356	0.195652	0.325581	0.258427	NA	NA	0.723077	NA	13.7741	12.1212	25.8953	3.85675	5.50964	9.36639	7.7135	6.06061	13.7741
r194	0	1	1	0	2	2	2	0	2	1	2	3	99.0909	92	106	11	NA	0	NA	0	NA	0	99.0909	11	0	0.25	0.142857	0	0.666667	0.333333	2	0	0.333333	0.5	0.666667	0.6	NA	NA	NA	0.142857	0	0.917431	0.917431	0	1.83486	1.83486	1.83486	0	1.83486
r195	4	4	8	5	0	5	3	1	4	3	1	4	104.429	97	108	7	NA	0	NA	0	NA	0	104.429	7	0.363636	2	0.615385	0.5	0	0.3125	0.25	0.2	0.235294	0.25	0.2	0.235294	NA	NA	NA	0.615385	5.47196	5.47196	10.9439	6.83995	0	6.83995	4.10397	1.36799	5.47196
r196	3	0	3	0	1	1	2	0	2	0	2	2	273	273	273	4	NA	0	NA	0	273	4	NA	0	1.5	0	0.6	0	0.5	0.142857	0.666667	0	0.333333	0	2	0.333333	NA	NA	0.6	NA	2.74725	0	2.74725	0	0.915751	0.915751	1.8315	0	1.8315
r197	5	3	8	2	4	6	10	0	10	2	0	2	142.75	137	145	4	NA	0	NA	0	NA	0	142.75	4	0.357143	0.75	0.444444	0.117647	1.33333	0.3	1.11111	0	0.625	0.117647	0	0.0833333	NA	NA	NA	0.444444	8.75657	5.25394	14.0105	3.50263	7.00525	10.5079	17.5131	0	17.5131
r198	5	1	6	3	2	5	0	0	0	3	1	4	476	473	477	4	NA	0	NA	0	476	4	NA	0	0.833333	0.333333	0.666667	0.375	1	0.5	0	0	0	0.375	0.333333	0.363636	NA	NA	0.666667	NA	2.62605	0.52521	3.15126	1.57563	1.05042	2.62605	0	0	0
r199	22	11	33	8	0	8	9	3	12	2	3	5	3282	3086	3348	4	3282	4	NA	0	NA	0	NA	0	1.15789	1.83333	1.32	0.242424	0	0.16	0.28125	0.214286	0.26087	0.0512821	0.214286	0.0943396	1.32	NA	NA	NA	1.67581	0.837904	2.51371	0.609385	0	0.609385	0.685558	0.228519	0.914077
r19	0	0	0	0	0	0	0	0	0	0	0	0	NA	Seq_Length	0	NA	0	NA	0	NA	0	NA	0	NA	NA	NA	NA	NA	NA	NA	NA	NA	NA	NA	NA	NA	NA	NA	NA	NA	NA	NA	NA	NA	NA	NA	NA	NA	NA
r1	154	55	209	13	43	56	130	40	170	30	55	85	5869.88	5418	5931	41	5869.88	41	NA	0	NA	0	NA	0	0.890173	0.398551	0.672026	0.0414013	0.286667	0.12069	0.659898	0.261438	0.485714	0.10101	0.398551	0.195402	0.672026	NA	NA	NA	0.639894	0.228533	0.868427	0.054017	0.178672	0.232689	0.54017	0.166206	0.706376
r200	0	0	0	1	0	1	0	0	0	0	2	2	2189.75	2186	2191	4	2189.75	4	NA	0	NA	0	NA	0	0	0	0	NA	0	0.5	0	0	0	0	NA	2	0	NA	NA	NA	0	0	0	0.114168	0	0.114168	0	0	0
r201	0	0	0	1	0	1	0	0	0	0	0	0	4304	4304	4304	4	4304	4	NA	0	NA	0	NA	0	0	NA	0	NA	NA	NA	0	NA	0	0	NA	0	0	NA	NA	NA	0	0	0	0.0580855	0	0.0580855	0	0	0
r202	0	0	0	0	0	0	0	0	0	0	0	0	5430.4	5426	5445	5	5430.4	5	NA	0	NA	0	NA	0	NA	NA	NA	NA	NA	NA	NA	NA	NA	NA	NA	NA	NA	NA	NA	NA	0	0	0	0	0	0	0	0	0
r203	3	0	3	0	0	0	0	0	0	0	2	2	1837.25	1832	1840	4	1837.25	4	NA	0	NA	0	NA	0	NA	0	1.5	0	0	0	0	0	0	0	NA	0.666667	1.5	NA	NA	NA	0.408219	0	0.408219	0	0	0	0	0	0
r204	8	0	8	0	0	0	6	2	8	0	0	0	1148.67	1144	1152	3	1148.67	3	NA	0	NA	0	NA	0	1.33333	0	1	0	0	0	0.75	NA	1	0	0	0	1	NA	NA	NA	2.32153	0	2.32153	0	0	0	1.74115	0.580383	2.32153
r205	2	3	5	0	0	0	0	0	0	0	0	0	1514.75	1513	1516	4	1514.75	4	NA	0	NA	0	NA	0	NA	NA	NA	0	0	0	0	0	0	0	0	0	NA	NA	NA	NA	0.330087	0.495131	0.825219	0	0	0	0	0	0
r206	55	42	97	10	8	18	26	19	45	17	10	27	777.2	725	802	5	NA	0	777.2	5	NA	0	NA	0	1.03774	1.13514	1.07778	0.102041	0.112676	0.106509	0.317073	0.316667	0.316901	0.186813	0.144928	0.16875	NA	1.07778	NA	NA	14.1534	10.808	24.9614	2.57334	2.05867	4.63201	6.69068	4.88935	11.58
r207	40	0	40	0	0	0	3	0	3	0	0	0	204.667	200	206	6	NA	0	NA	0	205.6	5	200	1	13.3333	NA	13.3333	0	NA	0	0.075	NA	0.075	0	NA	0	NA	NA	13.3333	NA	32.5733	0	32.5733	0	0	0	2.443	0	2.443
r208	4	4	8	2	2	4	4	2	6	7	0	7	245.6	244	248	5	NA	0	NA	0	245.6	5	NA	0	0.307692	1	0.470588	0.133333	0.333333	0.190476	0.307692	0.333333	0.315789	0.7	0	0.388889	NA	NA	0.470588	NA	3.25733	3.25733	6.51466	1.62866	1.62866	3.25733	3.25733	1.62866	4.88599
r209	2	1	3	1	0	1	0	0	0	1	0	1	293	293	293	4	NA	0	NA	0	293	4	NA	0	1	NA	1.5	0.333333	0	0.25	0	0	0	0.333333	0	0.25	NA	NA	1.5	NA	1.70648	0.853242	2.55973	0.853242	0	0.853242	0	0	0
r20	10	3	13	25	1	26	18	0	18	9	0	9	5687.38	5429	5705	16	5687.38	16	NA	0	NA	0	NA	0	0.192308	3	0.245283	0.675676	0.333333	0.65	0.409091	0	0.375	0.169811	0	0.157895	0.245283	NA	NA	NA	0.109893	0.0329678	0.14286	0.274731	0.0109893	0.285721	0.197807	0	0.197807
r210	111	39	150	12	12	24	21	18	39	10	15	25	1712	1647	1735	4	1712	4	NA	0	NA	0	NA	0	2.5814	0.866667	1.70455	0.084507	0.166667	0.11215	0.157895	0.272727	0.19598	0.0694444	0.217391	0.117371	1.70455	NA	NA	NA	16.2091	5.69509	21.9042	1.75234	1.75234	3.50467	3.06659	2.6285	5.69509
r211	8	0	8	0	0	0	0	0	0	4	0	4	72	72	72	14	NA	0	NA	0	NA	0	72	14	2	NA	2	0	NA	0	0	NA	0	0.5	NA	0.5	NA	NA	NA	2	7.93651	0	7.93651	0	0	0	0	0	0
r212	1	0	1	3	1	4	0	0	0	0	0	0	116.167	114	117	6	NA	0	NA	0	NA	0	116.167	6	0.333333	0	0.25	3	NA	4	0	0	0	0	0	0	NA	NA	NA	0.25	1.43472	0	1.43472	4.30416	1.43472	5.73888	0	0	0
r213	1	0	1	1	2	3	3	1	4	4	0	4	58.5	57	60	6	NA	0	NA	0	NA	0	58.5	6	0.125	0	0.0909091	0.125	2	0.333333	0.5	0.5	0.5	0.8	0	0.5	NA	NA	NA	0.0909091	2.849	0	2.849	2.849	5.69801	8.54701	8.54701	2.849	11.396
r214	16	0	16	0	0	0	4	2	6	0	1	1	267	264	268	4	NA	0	NA	0	267	4	NA	0	4	0	2.28571	0	0	0	0.25	2	0.352941	0	0.5	0.0454545	NA	NA	2.28571	NA	14.9813	0	14.9813	0	0	0	3.74532	1.87266	5.61798
r215	9	9	18	1	0	1	1	3	4	1	1	2	757.25	755	758	4	NA	0	757.25	4	NA	0	NA	0	3	2.25	2.57143	0.0909091	0	0.0416667	0.0909091	0.3	0.190476	0.0909091	0.0833333	0.0869565	NA	2.57143	NA	NA	2.97128	2.97128	5.94256	0.330142	0	0.330142	0.330142	0.990426	1.32057
r216	8	1	9	0	0	0	1	1	2	1	0	1	210.5	209	211	4	NA	0	NA	0	210.5	4	NA	0	4	1	3	0	0	0	0.111111	1	0.2	0.111111	0	0.0909091	NA	NA	3	NA	9.50119	1.18765	10.6888	0	0	0	1.18765	1.18765	2.3753
r217	171	129	300	70	67	137	175	151	326	157	119	276	2163.17	2023	2195	6	2163.17	6	NA	0	NA	0	NA	0	0.425373	0.382789	0.405954	0.139165	0.16792	0.151885	0.439698	0.479365	0.457223	0.377404	0.342939	0.36173	0.405954	NA	NA	NA	13.1751	9.93913	23.1143	5.39333	5.16219	10.5555	13.4833	11.6342	25.1175
r218	30	1	31	6	6	12	1	2	3	4	1	5	264	262	266	6	NA	0	NA	0	264	6	NA	0	2.72727	0.111111	1.55	0.171429	1.5	0.307692	0.025	0.25	0.0625	0.108108	0.111111	0.108696	NA	NA	1.55	NA	18.9394	0.631313	19.5707	3.78788	3.78788	7.57576	0.631313	1.26263	1.89394
r219	3	6	9	0	0	0	0	0	0	6	0	6	92.5	89	96	6	NA	0	NA	0	NA	0	92.5	6	0.5	NA	1.5	0	0	0	0	0	0	2	0	0.666667	NA	NA	NA	1.5	5.40541	10.8108	16.2162	0	0	0	0	0	0
r21	4	2	6	4	0	4	0	1	1	44	0	44	3390.59	3316	3397	46	3390.59	46	NA	0	NA	0	NA	0	0.0833333	2	0.122449	0.0833333	0	0.0784314	0	0.5	0.0185185	5.5	0	4	0.122449	NA	NA	NA	0.0256465	0.0128232	0.0384697	0.0256465	0	0.0256465	0	0.00641161	0.00641161
r220	4	3	7	1	6	7	6	5	11	1	2	3	115.4	111	119	5	NA	0	NA	0	NA	0	115.4	5	0.5	0.230769	0.333333	0.0909091	0.6	0.333333	1	0.454545	0.647059	0.0909091	0.142857	0.12	NA	NA	NA	0.333333	6.93241	5.19931	12.1317	1.7331	10.3986	12.1317	10.3986	8.66551	19.0641
r221	12	16	28	3	3	6	5	1	6	6	7	13	702.5	687	718	2	NA	0	702.5	2	NA	0	NA	0	0.857143	1.45455	1.12	0.130435	0.125	0.12766	0.238095	0.0384615	0.12766	0.3	0.35	0.325	NA	1.12	NA	NA	8.54093	11.3879	19.9288	2.13523	2.13523	4.27046	3.55872	0.711744	4.27046
r222	6	0	6	1	0	1	3	0	3	0	6	6	105	104	106	4	NA	0	NA	0	NA	0	105	4	1.5	0	0.6	0.111111	0	0.0666667	0.428571	0	0.230769	0	NA	0.6	NA	NA	NA	0.6	14.2857	0	14.2857	2.38095	0	2.38095	7.14286	0	7.14286
r223	0	0	0	0	0	0	0	0	0	0	0	0	61	61	61	2	NA	0	NA	0	NA	0	61	2	NA	NA	NA	NA	NA	NA	NA	NA	NA	NA	NA	NA	NA	NA	NA	NA	0	0	0	0	0	0	0	0	0
r224	45	0	45	1	0	1	4	1	5	2	0	2	350.8	349	352	5	NA	0	NA	0	350.8	5	NA	0	6.42857	0	5.625	0.0196078	0	0.0192308	0.0833333	NA	0.104167	0.04	0	0.0392157	NA	NA	5.625	NA	25.6556	0	25.6556	0.570125	0	0.570125	2.2805	0.570125	2.85063
r225	0	0	0	0	0	0	0	0	0	0	0	0	49	49	49	6	NA	0	NA	0	NA	0	49	6	NA	NA	NA	NA	NA	NA	NA	NA	NA	NA	NA	NA	NA	NA	NA	NA	0	0	0	0	0	0	0	0	0
r226	37	27	64	10	19	29	22	7	29	13	10	23	815.25	813	820	4	NA	0	815.25	4	NA	0	NA	0	0.822222	0.75	0.790123	0.138889	0.431818	0.25	0.366667	0.125	0.25	0.188406	0.188679	0.188525	NA	0.790123	NA	NA	11.3462	8.27967	19.6259	3.06654	5.82643	8.89298	6.7464	2.14658	8.89298
r227	18	18	36	49	9	58	73	13	86	20	15	35	210.196	195	220	46	NA	0	NA	0	210.533	45	195	1	0.126761	0.486486	0.201117	0.441441	0.195652	0.369427	0.83908	0.309524	0.666667	0.142857	0.375	0.194444	NA	NA	0.201149	0.2	1.86162	1.86162	3.72324	5.06774	0.93081	5.99855	7.5499	1.3445	8.8944
r228	20	18	38	8	8	16	4	7	11	4	3	7	450	441	472	4	NA	0	NA	0	450	4	NA	0	1.25	1	1.11765	0.285714	0.285714	0.285714	0.125	0.241379	0.180328	0.125	0.0909091	0.107692	NA	NA	1.11765	NA	11.1111	10	21.1111	4.44444	4.44444	8.88889	2.22222	3.88889	6.11111
r229	68	0	68	0	0	0	2	0	2	3	0	3	881	878	884	4	NA	0	881	4	NA	0	NA	0	13.6	NA	13.6	0	NA	0	0.028169	NA	0.028169	0.0428571	NA	0.0428571	NA	13.6	NA	NA	19.2963	0	19.2963	0	0	0	0.567537	0	0.567537
r22	114	8	122	27	1	28	15	5	20	15	5	20	233.038	217	239	53	NA	0	NA	0	233.038	53	NA	0	2	0.727273	1.79412	0.1875	0.0555556	0.17284	0.0961538	0.357143	0.117647	0.0961538	0.357143	0.117647	NA	NA	1.79412	NA	9.23002	0.647721	9.87774	2.18606	0.0809651	2.26702	1.21448	0.404826	1.6193
r230	4	0	4	1	0	1	0	0	0	1	0	1	247	247	247	4	NA	0	NA	0	247	4	NA	0	2	NA	2	0.2	NA	0.2	0	NA	0	0.2	NA	0.2	NA	NA	2	NA	4.04858	0	4.04858	1.01215	0	1.01215	0	0	0
r231	7	2	9	8	1	9	0	2	2	0	0	0	122	116	126	5	NA	0	NA	0	NA	0	122	5	0.875	0.666667	0.818182	1.14286	0.25	0.818182	0	0.666667	0.111111	0	0	0	NA	NA	NA	0.818182	11.4754	3.27869	14.7541	13.1148	1.63934	14.7541	0	3.27869	3.27869
r232	0	1	1	0	1	1	0	1	1	0	2	2	200.667	198	202	3	NA	0	NA	0	202	2	198	1	NA	0.25	0.25	NA	0.25	0.25	NA	0.25	0.25	NA	0.666667	0.666667	NA	NA	NA	0.25	0	1.66113	1.66113	0	1.66113	1.66113	0	1.66113	1.66113
r233	0	0	0	3	2	5	3	0	3	0	0	0	52.8	51	54	15	NA	0	NA	0	NA	0	52.8	15	0	0	0	1	NA	1.66667	1	0	0.6	0	0	0	NA	NA	NA	0	0	0	0	3.78788	2.52525	6.31313	3.78788	0	3.78788
r234	57	3	60	1	4	5	9	3	12	1	0	1	3132.25	3131	3136	4	3132.25	4	NA	0	NA	0	NA	0	5.18182	0.428571	3.33333	0.0149254	0.666667	0.0684932	0.152542	0.428571	0.181818	0.0149254	0	0.012987	3.33333	NA	NA	NA	4.54945	0.239444	4.78889	0.0798148	0.319259	0.399074	0.718333	0.239444	0.957778
r235	35	0	35	1	1	2	0	1	1	3	1	4	714.5	693	722	4	NA	0	714.5	4	NA	0	NA	0	8.75	0	5	0.0263158	0.5	0.05	0	0.5	0.0243902	0.0833333	0.5	0.105263	NA	5	NA	NA	12.2463	0	12.2463	0.349895	0.349895	0.69979	0	0.349895	0.349895
r236	22	14	36	14	7	21	9	10	19	12	18	30	780.75	776	784	4	NA	0	780.75	4	NA	0	NA	0	0.628571	0.4	0.514286	0.325581	0.166667	0.247059	0.1875	0.25641	0.218391	0.266667	0.580645	0.394737	NA	0.514286	NA	NA	7.04451	4.48287	11.5274	4.48287	2.24143	6.7243	2.88184	3.20205	6.08389
r237	10	0	10	0	0	0	3	0	3	0	0	0	903.5	902	904	4	NA	0	903.5	4	NA	0	NA	0	3.33333	NA	3.33333	0	NA	0	0.3	NA	0.3	0	NA	0	NA	3.33333	NA	NA	2.76702	0	2.76702	0	0	0	0.830105	0	0.830105
r238	12	7	19	5	0	5	1	4	5	1	3	4	133	133	133	4	NA	0	NA	0	NA	0	133	4	1.71429	1	1.35714	0.357143	0	0.178571	0.0555556	0.4	0.178571	0.0555556	0.272727	0.137931	NA	NA	NA	1.35714	22.5564	13.1579	35.7143	9.3985	0	9.3985	1.8797	7.5188	9.3985
r239	52	14	66	0	4	4	8	6	14	4	2	6	1772.5	1717	1807	6	1772.5	6	NA	0	NA	0	NA	0	4.33333	1.16667	2.75	0	0.181818	0.0465116	0.142857	0.3	0.184211	0.0666667	0.0833333	0.0714286	2.75	NA	NA	NA	4.88952	1.31641	6.20592	0	0.376117	0.376117	0.752233	0.564175	1.31641
r23	22	1	23	163	5	168	113	78	191	6	3	9	169.052	154	171	96	NA	0	NA	0	NA	0	169.052	96	0.0780142	0.0116279	0.0625	1.15603	0.0609756	0.753363	0.591623	8.66667	0.955	0.0201342	0.0357143	0.0235602	NA	NA	NA	0.0625	1.3556	0.0616181	1.41722	10.0437	0.30809	10.3518	6.96284	4.80621	11.7691
r240	2	0	2	0	0	0	0	0	0	1	1	2	232	232	232	4	NA	0	NA	0	232	4	NA	0	2	0	1	0	0	0	0	0	0	0.5	NA	1	NA	NA	1	NA	2.15517	0	2.15517	0	0	0	0	0	0
r241	0	0	0	0	0	0	2	0	2	0	0	0	57.6	56	58	5	NA	0	NA	0	NA	0	57.6	5	0	NA	0	0	NA	0	NA	NA	NA	0	NA	0	NA	NA	NA	0	0	0	0	0	0	0	6.94444	0	6.94444
r242	5	0	5	0	0	0	1	0	1	0	0	0	79.5	77	82	4	NA	0	NA	0	NA	0	79.5	4	5	NA	5	0	NA	0	0.2	NA	0.2	0	NA	0	NA	NA	NA	5	15.7233	0	15.7233	0	0	0	3.14465	0	3.14465
r243	60	2	62	1	0	1	9	1	10	5	0	5	565.4	554	569	5	NA	0	565.4	5	NA	0	NA	0	4	2	3.875	0.0135135	0	0.012987	0.136364	0.5	0.147059	0.0714286	0	0.0684932	NA	3.875	NA	NA	21.2239	0.707464	21.9314	0.353732	0	0.353732	3.18359	0.353732	3.53732
r244	86	7	93	2	2	4	15	3	18	8	6	14	1446.25	1438	1449	4	1446.25	4	NA	0	NA	0	NA	0	3.44	0.636364	2.58333	0.0183486	0.125	0.032	0.15625	0.2	0.162162	0.0776699	0.5	0.121739	2.58333	NA	NA	NA	14.866	1.21003	16.0761	0.345722	0.345722	0.691443	2.59291	0.518583	3.1115
r245	3	0	3	0	0	0	0	0	0	0	0	0	296.75	296	297	4	NA	0	NA	0	296.75	4	NA	0	NA	NA	NA	0	NA	0	0	NA	0	0	NA	0	NA	NA	NA	NA	2.52738	0	2.52738	0	0	0	0	0	0
r246	65	14	79	30	25	55	53	46	99	32	32	64	1124.5	1067	1144	4	1124.5	4	NA	0	NA	0	NA	0	0.565217	0.135922	0.362385	0.2	0.271739	0.227273	0.417323	0.647887	0.5	0.216216	0.376471	0.274678	0.362385	NA	NA	NA	14.4509	3.11249	17.5634	6.66963	5.55803	12.2277	11.783	10.2268	22.0098
r247	21	294	315	0	0	0	276	0	276	289	11	300	250.983	115	262	229	NA	0	NA	0	254.991	222	123.857	7	0.0371681	26.7273	0.546875	0	0	0	0.890323	0	0.44878	0.973064	0.037415	0.507614	NA	NA	0.496403	1.95	0.365376	5.11527	5.48064	0	0	0	4.80209	0	4.80209
r248	12	2	14	1	0	1	3	4	7	1	1	2	240.25	236	242	4	NA	0	NA	0	240.25	4	NA	0	2.4	0.4	1.4	0.0625	0	0.0434783	0.214286	1.33333	0.411765	0.0625	0.166667	0.0909091	NA	NA	1.4	NA	12.487	2.08117	14.5682	1.04058	0	1.04058	3.12175	4.16233	7.28408
r249	0	0	0	0	0	0	0	0	0	1	0	1	60	60	60	7	NA	0	NA	0	NA	0	60	7	0	NA	0	0	NA	0	0	NA	0	NA	NA	NA	NA	NA	NA	0	0	0	0	0	0	0	0	0	0
r24	0	0	0	0	0	0	0	0	0	0	0	0	NA	Seq_Length	0	NA	0	NA	0	NA	0	NA	0	NA	NA	NA	NA	NA	NA	NA	NA	NA	NA	NA	NA	NA	NA	NA	NA	NA	NA	NA	NA	NA	NA	NA	NA	NA	NA
r250	9	2	11	0	0	0	1	1	2	4	5	9	84.1667	82	85	6	NA	0	NA	0	NA	0	84.1667	6	1.8	0.333333	1	0	0	0	0.0769231	0.142857	0.1	0.4	1.66667	0.692308	NA	NA	NA	1	17.8218	3.9604	21.7822	0	0	0	1.9802	1.9802	3.9604
r251	4	4	8	8	4	12	2	0	2	0	4	4	98.6	97	100	5	NA	0	NA	0	NA	0	98.6	5	0.4	0.5	0.444444	1.33333	0.5	0.857143	0.166667	0	0.0833333	0	0.5	0.181818	NA	NA	NA	0.444444	8.11359	8.11359	16.2272	16.2272	8.11359	24.3408	4.0568	0	4.0568
r252	50	1	51	4	1	5	2	2	4	6	1	7	364.8	360	366	5	NA	0	NA	0	364.8	5	NA	0	4.16667	0.25	3.1875	0.0689655	0.25	0.0806452	0.0333333	0.666667	0.0634921	0.107143	0.25	0.116667	NA	NA	3.1875	NA	27.4123	0.548246	27.9605	2.19298	0.548246	2.74123	1.09649	1.09649	2.19298
r253	27	2	29	0	0	0	4	1	5	1	0	1	182.2	177	185	5	NA	0	NA	0	NA	0	182.2	5	5.4	2	4.83333	0	0	0	0.142857	0.5	0.166667	0.0322581	0	0.0294118	NA	NA	NA	4.83333	29.6378	2.19539	31.8332	0	0	0	4.39078	1.09769	5.48847
r254	12	1	13	0	0	0	0	0	0	0	0	0	802.25	800	804	4	NA	0	802.25	4	NA	0	NA	0	NA	NA	NA	0	0	0	0	0	0	0	0	0	NA	NA	NA	NA	3.73948	0.311624	4.05111	0	0	0	0	0	0
r255	0	0	0	0	0	0	0	0	0	0	0	0	2022.25	2011	2027	4	2022.25	4	NA	0	NA	0	NA	0	NA	NA	NA	NA	NA	NA	NA	NA	NA	NA	NA	NA	NA	NA	NA	NA	0	0	0	0	0	0	0	0	0
r256	15	5	20	7	2	9	6	3	9	3	1	4	598.2	597	601	5	NA	0	598.2	5	NA	0	NA	0	0.9375	0.833333	0.909091	0.291667	0.222222	0.272727	0.24	0.375	0.272727	0.107143	0.1	0.105263	NA	0.909091	NA	NA	5.01505	1.67168	6.68673	2.34035	0.668673	3.00903	2.00602	1.00301	3.00903
r257	57	50	107	36	37	73	57	75	132	60	32	92	2328	2309	2353	3	2328	3	NA	0	NA	0	NA	0	0.372549	0.347222	0.360269	0.206897	0.235669	0.220544	0.372549	0.630252	0.485294	0.4	0.197531	0.294872	0.360269	NA	NA	NA	8.16151	7.15922	15.3207	5.15464	5.29782	10.4525	8.16151	10.7388	18.9003
r258	3	0	3	3	0	3	2	0	2	1	3	4	197	160	308	4	NA	0	NA	0	308	1	160	3	0.5	0	0.333333	0.5	0	0.333333	0.285714	0	0.2	0.125	NA	0.5	NA	NA	NA	0.333333	3.80711	0	3.80711	3.80711	0	3.80711	2.53807	0	2.53807
r259	13	13	26	2	5	7	7	5	12	3	6	9	1156.25	1153	1158	4	1156.25	4	NA	0	NA	0	NA	0	1.08333	0.8125	0.928571	0.0869565	0.208333	0.148936	0.388889	0.208333	0.285714	0.136364	0.26087	0.2	0.928571	NA	NA	NA	2.81081	2.81081	5.62162	0.432432	1.08108	1.51351	1.51351	1.08108	2.59459
r25	0	0	0	0	0	0	0	0	0	0	0	0	NA	Seq_Length	0	NA	0	NA	0	NA	0	NA	0	NA	NA	NA	NA	NA	NA	NA	NA	NA	NA	NA	NA	NA	NA	NA	NA	NA	NA	NA	NA	NA	NA	NA	NA	NA	NA
r260	11	10	21	2	4	6	9	5	14	26	7	33	164	160	168	5	NA	0	NA	0	NA	0	164	5	0.297297	0.625	0.396226	0.0434783	0.181818	0.0882353	0.230769	0.238095	0.233333	1.18182	0.368421	0.804878	NA	NA	NA	0.396226	13.4146	12.1951	25.6098	2.43902	4.87805	7.31707	10.9756	6.09756	17.0732
r261	0	0	0	0	0	0	0	0	0	0	0	0	71	71	71	4	NA	0	NA	0	NA	0	71	4	NA	NA	NA	NA	NA	NA	NA	NA	NA	NA	NA	NA	NA	NA	NA	NA	0	0	0	0	0	0	0	0	0
r262	1	8	9	2	4	6	2	1	3	11	3	14	410.25	388	418	4	NA	0	NA	0	410.25	4	NA	0	0.0666667	1	0.391304	0.142857	0.333333	0.230769	0.142857	0.0666667	0.103448	2.2	0.230769	0.777778	NA	NA	0.391304	NA	0.609385	4.87508	5.48446	1.21877	2.43754	3.65631	1.21877	0.609385	1.82815
r263	0	0	0	0	0	0	0	0	0	0	0	0	55	55	55	3	NA	0	NA	0	NA	0	55	3	NA	NA	NA	NA	NA	NA	NA	NA	NA	NA	NA	NA	NA	NA	NA	NA	0	0	0	0	0	0	0	0	0
r264	89	0	89	1	1	2	8	4	12	3	0	3	1682.5	1681	1683	4	1682.5	4	NA	0	NA	0	NA	0	7.41667	0	5.23529	0.01	0.25	0.0192308	0.0860215	4	0.12766	0.0306122	0	0.0291262	5.23529	NA	NA	NA	13.2244	0	13.2244	0.148588	0.148588	0.297177	1.18871	0.594354	1.78306
r265	10	0	10	1	1	2	2	0	2	2	1	3	271	271	271	3	NA	0	NA	0	271	3	NA	0	2	0	1.42857	0.0714286	1	0.133333	0.153846	0	0.133333	0.153846	1	0.214286	NA	NA	1.42857	NA	12.3001	0	12.3001	1.23001	1.23001	2.46002	2.46002	0	2.46002
r266	1	2	3	0	3	3	11	0	11	0	0	0	84.8	84	85	5	NA	0	NA	0	NA	0	84.8	5	0.0909091	0.666667	0.214286	0	1.5	0.214286	11	0	1.83333	0	0	0	NA	NA	NA	0.214286	2.35849	4.71698	7.07547	0	7.07547	7.07547	25.9434	0	25.9434
r267	382	684	1066	0	92	92	328	0	328	367	291	658	179.034	115	256	321	NA	0	NA	0	254.523	130	127.654	191	0.54964	1.7859	0.988868	0	0.094359	0.0448343	0.437917	0	0.180617	0.516901	0.375	0.442799	NA	NA	0.5	1.2259	6.64695	11.9019	18.5488	0	1.60084	1.60084	5.70733	0	5.70733
r268	36	3	39	2	1	3	9	2	11	1	0	1	2008	2007	2009	4	2008	4	NA	0	NA	0	NA	0	3	1	2.6	0.0434783	0.2	0.0588235	0.230769	0.5	0.255814	0.0212766	0	0.0188679	2.6	NA	NA	NA	4.48207	0.373506	4.85558	0.249004	0.124502	0.373506	1.12052	0.249004	1.36952
r269	23	12	35	5	2	7	13	5	18	2	6	8	632.75	593	646	4	NA	0	632.75	4	NA	0	NA	0	1.15	0.923077	1.06061	0.131579	0.0869565	0.114754	0.433333	0.25	0.36	0.0487805	0.315789	0.133333	NA	1.06061	NA	NA	9.08732	4.74121	13.8285	1.9755	0.790202	2.76571	5.13631	1.9755	7.11181
r26	233	30	263	166	77	243	19	35	54	23	7	30	223.831	206	232	89	NA	0	NA	0	223.831	89	NA	0	1.12019	0.252101	0.804281	0.603636	1.06944	0.700288	0.0450237	0.307018	0.100746	0.0550239	0.0492958	0.0535714	NA	NA	0.804281	NA	11.6962	1.50595	13.2021	8.33292	3.86527	12.1982	0.953767	1.75694	2.71071
r270	3	0	3	0	3	3	0	0	0	0	0	0	73	73	73	4	NA	0	NA	0	NA	0	73	4	NA	0	1	0	NA	1	0	0	0	0	0	0	NA	NA	NA	1	10.274	0	10.274	0	10.274	10.274	0	0	0
r271	15	1	16	3	0	3	3	0	3	4	0	4	74.4	71	75	10	NA	0	NA	0	NA	0	74.4	10	1.5	NA	1.6	0.136364	0	0.130435	0.136364	0	0.130435	0.190476	0	0.181818	NA	NA	NA	1.6	20.1613	1.34409	21.5054	4.03226	0	4.03226	4.03226	0	4.03226
r272	150	5	155	1	0	1	15	4	19	7	3	10	1283.75	1274	1289	4	1283.75	4	NA	0	NA	0	NA	0	6.52174	0.714286	5.16667	0.00581395	0	0.00543478	0.0949367	0.5	0.114458	0.0421687	0.333333	0.0571429	5.16667	NA	NA	NA	29.2113	0.97371	30.185	0.194742	0	0.194742	2.92113	0.778968	3.7001
r273	10	8	18	0	4	4	4	3	7	6	1	7	125.6	122	129	5	NA	0	NA	0	NA	0	125.6	5	1	1	1	0	0.333333	0.125	0.25	0.230769	0.241379	0.428571	0.0666667	0.241379	NA	NA	NA	1	15.9236	12.7389	28.6624	0	6.36943	6.36943	6.36943	4.77707	11.1465
r274	8	2	10	4	5	9	2	0	2	0	0	0	177.75	174	179	4	NA	0	NA	0	NA	0	177.75	4	1.33333	0.4	0.909091	0.4	2.5	0.75	0.166667	0	0.105263	0	0	0	NA	NA	NA	0.909091	11.2518	2.81294	14.0647	5.62588	7.03235	12.6582	2.81294	0	2.81294
r275	4	0	4	0	1	1	2	0	2	0	2	2	343	343	343	4	NA	0	NA	0	343	4	NA	0	2	0	0.8	0	0.5	0.125	0.5	0	0.285714	0	2	0.285714	NA	NA	0.8	NA	2.91545	0	2.91545	0	0.728863	0.728863	1.45773	0	1.45773
r276	1	0	1	3	0	3	1	0	1	2	0	2	146	146	146	3	NA	0	NA	0	NA	0	146	3	0.166667	NA	0.166667	0.75	NA	0.75	0.166667	NA	0.166667	0.4	NA	0.4	NA	NA	NA	0.166667	2.28311	0	2.28311	6.84932	0	6.84932	2.28311	0	2.28311
r277	21	0	21	0	0	0	1	1	2	0	0	0	795.5	768	805	4	NA	0	795.5	4	NA	0	NA	0	21	0	10.5	0	0	0	0.047619	NA	0.0952381	0	0	0	NA	10.5	NA	NA	6.59962	0	6.59962	0	0	0	0.314268	0.314268	0.628536
r278	120	6	126	6	1	7	14	3	17	11	1	12	1098	1073	1107	4	1098	4	NA	0	NA	0	NA	0	3.87097	1.2	3.5	0.0413793	0.1	0.0451613	0.10219	0.375	0.117241	0.0785714	0.1	0.08	3.5	NA	NA	NA	27.3224	1.36612	28.6885	1.36612	0.227687	1.59381	3.18761	0.68306	3.87067
r279	81	0	81	3	2	5	10	1	11	4	2	6	1100	1100	1100	3	1100	3	NA	0	NA	0	NA	0	4.76471	0	3.68182	0.0315789	0.666667	0.0510204	0.113636	0.25	0.119565	0.0425532	0.666667	0.0618557	3.68182	NA	NA	NA	24.5455	0	24.5455	0.909091	0.606061	1.51515	3.0303	0.30303	3.33333
r27	106	2	108	30	3	33	74	2	76	10	19	29	151.068	141	153	74	NA	0	NA	0	NA	0	151.068	74	0.929825	0.0833333	0.782609	0.157895	0.130435	0.15493	0.506849	0.0833333	0.447059	0.047619	2.71429	0.133641	NA	NA	NA	0.782609	9.48206	0.178907	9.66097	2.6836	0.26836	2.95196	6.61955	0.178907	6.79846
r280	0	0	0	0	0	0	0	0	0	0	0	0	886	883	887	4	NA	0	886	4	NA	0	NA	0	NA	NA	NA	NA	NA	NA	NA	NA	NA	NA	NA	NA	NA	NA	NA	NA	0	0	0	0	0	0	0	0	0
r281	5	0	5	8	1	9	1	0	1	0	0	0	92.8333	90	94	6	NA	0	NA	0	NA	0	92.8333	6	0.555556	0	0.5	1.33333	NA	1.5	0.0769231	0	0.0714286	0	0	0	NA	NA	NA	0.5	8.97666	0	8.97666	14.3627	1.79533	16.158	1.79533	0	1.79533
r282	56	10	66	1	4	5	5	1	6	5	0	5	1413.75	1411	1415	4	1413.75	4	NA	0	NA	0	NA	0	5.09091	2	4.125	0.0151515	0.363636	0.0649351	0.0806452	0.0714286	0.0789474	0.0806452	0	0.0649351	4.125	NA	NA	NA	9.90274	1.76835	11.6711	0.176835	0.707339	0.884173	0.884173	0.176835	1.06101
r283	0	0	0	0	1	1	0	0	0	0	0	0	74	74	74	4	NA	0	NA	0	NA	0	74	4	NA	0	0	NA	NA	NA	NA	0	0	NA	0	0	NA	NA	NA	0	0	0	0	0	3.37838	3.37838	0	0	0
r284	0	0	0	0	0	0	0	0	0	0	0	0	73.75	73	74	4	NA	0	NA	0	NA	0	73.75	4	NA	NA	NA	NA	NA	NA	NA	NA	NA	NA	NA	NA	NA	NA	NA	NA	0	0	0	0	0	0	0	0	0
r285	7	0	7	2	3	5	7	1	8	2	0	2	268.25	266	269	4	NA	0	NA	0	268.25	4	NA	0	0.636364	0	0.466667	0.125	3	0.294118	0.636364	0.333333	0.571429	0.125	0	0.1	NA	NA	0.466667	NA	6.52377	0	6.52377	1.86393	2.7959	4.65983	6.52377	0.931966	7.45573
r286	3	2	5	1	0	1	2	1	3	3	0	3	83.75	80	85	4	NA	0	NA	0	NA	0	83.75	4	0.5	2	0.714286	0.125	0	0.0909091	0.285714	0.5	0.333333	0.5	0	0.333333	NA	NA	NA	0.714286	8.95522	5.97015	14.9254	2.98507	0	2.98507	5.97015	2.98507	8.95522
r287	4	2	6	5	2	7	4	1	5	0	0	0	103	103	103	4	NA	0	NA	0	NA	0	103	4	0.444444	0.666667	0.5	0.625	0.666667	0.636364	0.444444	0.25	0.384615	0	0	0	NA	NA	NA	0.5	9.70874	4.85437	14.5631	12.1359	4.85437	16.9903	9.70874	2.42718	12.1359
r288	28	24	52	12	17	29	11	9	20	15	26	41	1330	1321	1334	4	1330	4	NA	0	NA	0	NA	0	0.736842	0.461538	0.577778	0.222222	0.288136	0.256637	0.2	0.134328	0.163934	0.294118	0.52	0.405941	0.577778	NA	NA	NA	5.26316	4.51128	9.77444	2.25564	3.19549	5.45113	2.06767	1.69173	3.7594
r289	8	0	8	1	6	7	0	1	1	7	0	7	52.5714	50	55	7	NA	0	NA	0	NA	0	52.5714	7	1	0	0.533333	0.0666667	6	0.4375	0	0.166667	0.0454545	0.777778	0	0.4375	NA	NA	NA	0.533333	21.7391	0	21.7391	2.71739	16.3043	19.0217	0	2.71739	2.71739
r28	0	0	0	0	0	0	0	0	0	0	0	0	NA	Seq_Length	0	NA	0	NA	0	NA	0	NA	0	NA	NA	NA	NA	NA	NA	NA	NA	NA	NA	NA	NA	NA	NA	NA	NA	NA	NA	NA	NA	NA	NA	NA	NA	NA	NA
r290	33	14	47	9	10	19	23	19	42	16	9	25	262.667	253	269	6	NA	0	NA	0	262.667	6	NA	0	0.6875	0.368421	0.546512	0.125	0.238095	0.166667	0.396552	0.575758	0.461538	0.246154	0.209302	0.231481	NA	NA	0.546512	NA	20.9391	8.88325	29.8223	5.71066	6.34518	12.0558	14.5939	12.0558	26.6497
r291	0	0	0	0	0	0	0	0	0	3	0	3	186.75	186	187	4	NA	0	NA	0	NA	0	186.75	4	0	NA	0	0	NA	0	0	NA	0	NA	NA	NA	NA	NA	NA	0	0	0	0	0	0	0	0	0	0
r292	80	7	87	1	3	4	16	5	21	4	9	13	753	752	754	4	NA	0	753	4	NA	0	NA	0	3.80952	0.411765	2.28947	0.01	0.142857	0.0330579	0.188235	0.263158	0.201923	0.0412371	0.6	0.116071	NA	2.28947	NA	NA	26.5604	2.32404	28.8845	0.332005	0.996016	1.32802	5.31208	1.66003	6.97211
r293	3	0	3	5	0	5	1	2	3	0	0	0	128	128	128	4	NA	0	NA	0	NA	0	128	4	0.5	0	0.375	1.25	0	0.833333	0.125	NA	0.375	0	0	0	NA	NA	NA	0.375	5.85938	0	5.85938	9.76562	0	9.76562	1.95312	3.90625	5.85938
r294	0	1	1	1	0	1	3	5	8	1	0	1	160.667	159	162	6	NA	0	NA	0	NA	0	160.667	6	0	0.2	0.1	0.25	0	0.1	1.5	5	2.66667	0.25	0	0.1	NA	NA	NA	0.1	0	1.03734	1.03734	1.03734	0	1.03734	3.11203	5.18672	8.29876
r295	0	1	1	6	0	6	0	0	0	0	0	0	284.5	280	286	4	NA	0	NA	0	284.5	4	NA	0	0	NA	0.166667	NA	0	6	0	0	0	0	0	0	NA	NA	0.166667	NA	0	0.878735	0.878735	5.27241	0	5.27241	0	0	0
r296	0	0	0	1	0	1	0	0	0	0	0	0	429	429	429	3	NA	0	NA	0	429	3	NA	0	0	NA	0	NA	NA	NA	0	NA	0	0	NA	0	NA	NA	0	NA	0	0	0	0.777001	0	0.777001	0	0	0
r297	2	4	6	2	0	2	1	0	1	0	0	0	171.25	169	174	4	NA	0	NA	0	NA	0	171.25	4	0.666667	NA	2	0.666667	0	0.285714	0.25	0	0.125	0	0	0	NA	NA	NA	2	2.91971	5.83942	8.75912	2.91971	0	2.91971	1.45985	0	1.45985
r298	0	0	0	0	0	0	0	0	0	0	0	0	187	187	187	3	NA	0	NA	0	NA	0	187	3	NA	NA	NA	NA	NA	NA	NA	NA	NA	NA	NA	NA	NA	NA	NA	NA	0	0	0	0	0	0	0	0	0
r299	4	1	5	14	1	15	3	2	5	2	2	4	48.6667	46	50	12	NA	0	NA	0	NA	0	48.6667	12	0.210526	0.2	0.208333	1.55556	0.2	1.07143	0.15	0.5	0.208333	0.0952381	0.5	0.16	NA	NA	NA	0.208333	6.84932	1.71233	8.56164	23.9726	1.71233	25.6849	5.13699	3.42466	8.56164
r29	0	0	0	0	0	0	0	0	0	0	0	0	NA	Seq_Length	0	NA	0	NA	0	NA	0	NA	0	NA	NA	NA	NA	NA	NA	NA	NA	NA	NA	NA	NA	NA	NA	NA	NA	NA	NA	NA	NA	NA	NA	NA	NA	NA	NA
r2	204	0	204	0	0	0	0	0	0	0	0	0	313.961	312	314	103	NA	0	NA	0	313.961	103	NA	0	NA	NA	NA	0	NA	0	0	NA	0	0	NA	0	NA	NA	NA	NA	6.30837	0	6.30837	0	0	0	0	0	0
r300	0	1	1	2	0	2	0	2	2	0	0	0	128	128	128	3	NA	0	NA	0	NA	0	128	3	0	0.5	0.25	NA	0	0.666667	0	2	0.666667	0	0	0	NA	NA	NA	0.25	0	2.60417	2.60417	5.20833	0	5.20833	0	5.20833	5.20833
r301	2	1	3	0	0	0	0	0	0	0	1	1	189.25	187	190	4	NA	0	NA	0	NA	0	189.25	4	NA	1	3	0	0	0	0	0	0	0	1	0.333333	NA	NA	NA	3	2.64201	1.321	3.96301	0	0	0	0	0	0
r302	7	0	7	0	0	0	5	7	12	0	0	0	71	66	73	7	NA	0	NA	0	NA	0	71	7	1.4	0	0.583333	0	0	0	0.714286	NA	1.71429	0	0	0	NA	NA	NA	0.583333	14.0845	0	14.0845	0	0	0	10.0604	14.0845	24.1449
r303	17	0	17	0	0	0	1	0	1	0	0	0	314	314	314	4	NA	0	NA	0	314	4	NA	0	17	NA	17	0	NA	0	0.0588235	NA	0.0588235	0	NA	0	NA	NA	17	NA	13.535	0	13.535	0	0	0	0.796178	0	0.796178
r304	0	0	0	0	0	0	0	0	0	0	0	0	110	110	110	3	NA	0	NA	0	NA	0	110	3	NA	NA	NA	NA	NA	NA	NA	NA	NA	NA	NA	NA	NA	NA	NA	NA	0	0	0	0	0	0	0	0	0
r305	9	2	11	0	0	0	1	1	2	1	0	1	270.333	269	271	3	NA	0	NA	0	270.333	3	NA	0	4.5	2	3.66667	0	0	0	0.1	0.5	0.166667	0.1	0	0.0769231	NA	NA	3.66667	NA	11.0974	2.46609	13.5635	0	0	0	1.23305	1.23305	2.46609
r306	1	0	1	2	0	2	0	0	0	0	0	0	61	61	61	4	NA	0	NA	0	NA	0	61	4	0.5	NA	0.5	2	NA	2	0	NA	0	0	NA	0	NA	NA	NA	0.5	4.09836	0	4.09836	8.19672	0	8.19672	0	0	0
r307	0	0	0	14	0	14	4	2	6	11	0	11	67.6667	64	71	12	NA	0	NA	0	NA	0	67.6667	12	0	0	0	0.933333	0	0.823529	0.16	NA	0.24	0.611111	0	0.55	NA	NA	NA	0	0	0	0	17.2414	0	17.2414	4.92611	2.46305	7.38916
r308	21	2	23	2	5	7	8	1	9	11	0	11	144.143	136	149	7	NA	0	NA	0	NA	0	144.143	7	1	0.333333	0.851852	0.05	1.66667	0.162791	0.235294	0.142857	0.219512	0.354839	0	0.282051	NA	NA	NA	0.851852	20.8127	1.98216	22.7948	1.98216	4.9554	6.93756	7.92864	0.99108	8.91972
r309	0	0	0	1	0	1	0	0	0	0	2	2	73.75	73	74	4	NA	0	NA	0	NA	0	73.75	4	0	0	0	NA	0	0.5	0	0	0	0	NA	2	NA	NA	NA	0	0	0	0	3.38983	0	3.38983	0	0	0
r30	0	0	0	0	0	0	0	0	0	0	0	0	NA	Seq_Length	0	NA	0	NA	0	NA	0	NA	0	NA	NA	NA	NA	NA	NA	NA	NA	NA	NA	NA	NA	NA	NA	NA	NA	NA	NA	NA	NA	NA	NA	NA	NA	NA	NA
r310	80	32	112	25	27	52	14	16	30	45	26	71	243.516	239	247	31	NA	0	NA	0	243.516	31	NA	0	0.952381	0.463768	0.732026	0.179856	0.364865	0.244131	0.0933333	0.188235	0.12766	0.378151	0.346667	0.365979	NA	NA	0.732026	NA	10.5974	4.23897	14.8364	3.3117	3.57663	6.88833	1.85455	2.11949	3.97404
r311	27	3	30	2	0	2	5	3	8	2	0	2	386	386	386	4	NA	0	NA	0	386	4	NA	0	3	1	2.5	0.0588235	0	0.05	0.16129	1	0.235294	0.0588235	0	0.05	NA	NA	2.5	NA	17.487	1.94301	19.4301	1.29534	0	1.29534	3.23834	1.94301	5.18135
r312	1	1	2	3	2	5	3	1	4	5	1	6	107	104	108	4	NA	0	NA	0	NA	0	107	4	0.0909091	0.25	0.133333	0.333333	0.666667	0.416667	0.333333	0.25	0.307692	0.714286	0.25	0.545455	NA	NA	NA	0.133333	2.33645	2.33645	4.6729	7.00935	4.6729	11.6822	7.00935	2.33645	9.34579
r313	14	2	16	1	0	1	4	1	5	3	0	3	454.25	453	455	4	NA	0	NA	0	454.25	4	NA	0	1.75	2	1.77778	0.047619	0	0.0416667	0.222222	0.5	0.25	0.157895	0	0.136364	NA	NA	1.77778	NA	7.70501	1.10072	8.80572	0.550358	0	0.550358	2.20143	0.550358	2.75179
r314	573	684	1257	0	92	92	328	0	328	367	291	658	179.053	115	256	321	NA	0	NA	0	254.538	130	127.675	191	0.82446	1.7859	1.16605	0	0.094359	0.0410165	0.348936	0	0.163428	0.407325	0.375	0.392367	NA	NA	0.5	1.48898	9.96938	11.9006	21.87	0	1.60067	1.60067	5.70673	0	5.70673
r315	5	3	8	2	3	5	13	5	18	1	3	4	214.75	214	215	4	NA	0	NA	0	214.75	4	NA	0	0.3125	0.272727	0.296296	0.105263	0.272727	0.166667	1.625	0.555556	1.05882	0.05	0.272727	0.129032	NA	NA	0.296296	NA	5.82072	3.49243	9.31315	2.32829	3.49243	5.82072	15.1339	5.82072	20.9546
r316	76	8	84	7	8	15	5	5	10	5	8	13	876.75	830	893	4	NA	0	876.75	4	NA	0	NA	0	4.47059	0.380952	2.21053	0.0813953	0.380952	0.140187	0.0568182	0.208333	0.0892857	0.0568182	0.380952	0.119266	NA	2.21053	NA	NA	21.6709	2.28115	23.9521	1.99601	2.28115	4.27716	1.42572	1.42572	2.85144
r317	59	2	61	23	9	32	5	8	13	7	2	9	326.828	299	329	58	NA	0	NA	0	326.828	58	NA	0	1.68571	0.105263	1.12963	0.323944	0.75	0.385542	0.0561798	0.615385	0.127451	0.0804598	0.105263	0.0849057	NA	NA	1.12963	NA	3.11247	0.105507	3.21798	1.21334	0.474784	1.68812	0.263769	0.42203	0.685799
r318	2	0	2	0	0	0	6	0	6	0	0	0	247.75	246	250	4	NA	0	NA	0	247.75	4	NA	0	0.333333	NA	0.333333	0	NA	0	3	NA	3	0	NA	0	NA	NA	0.333333	NA	2.01816	0	2.01816	0	0	0	6.05449	0	6.05449
r319	21	3	24	8	1	9	8	7	15	13	2	15	78.1	75	82	10	NA	0	NA	0	NA	0	78.1	10	0.724138	0.3	0.615385	0.190476	0.0833333	0.166667	0.190476	1.16667	0.3125	0.351351	0.181818	0.3125	NA	NA	NA	0.615385	26.8886	3.84123	30.7298	10.2433	1.28041	11.5237	10.2433	8.96287	19.2061
r31	93	9	102	1	31	32	19	9	28	28	40	68	3249.43	3000	3326	42	3249.43	42	NA	0	NA	0	NA	0	1.9375	0.1125	0.796875	0.00714286	0.534483	0.161616	0.155738	0.1125	0.138614	0.247788	0.816327	0.419753	0.796875	NA	NA	NA	0.681438	0.0659457	0.747384	0.0073273	0.227146	0.234473	0.139219	0.0659457	0.205164
r320	1	0	1	0	0	0	1	0	1	0	0	0	87	87	87	4	NA	0	NA	0	NA	0	87	4	1	NA	1	0	NA	0	1	NA	1	0	NA	0	NA	NA	NA	1	2.87356	0	2.87356	0	0	0	2.87356	0	2.87356
r321	2	0	2	0	0	0	0	0	0	0	1	1	201	198	202	4	NA	0	NA	0	202	3	198	1	NA	0	2	0	0	0	0	0	0	0	NA	0.5	NA	NA	2	NA	2.48756	0	2.48756	0	0	0	0	0	0
r322	114	6	120	9	7	16	11	6	17	22	6	28	652	652	652	4	NA	0	652	4	NA	0	NA	0	2.71429	0.315789	1.96721	0.0612245	0.388889	0.0969697	0.0758621	0.315789	0.103659	0.164179	0.315789	0.183007	NA	1.96721	NA	NA	43.7117	2.30061	46.0123	3.45092	2.68405	6.13497	4.21779	2.30061	6.5184
r323	2	0	2	2	2	4	1	0	1	2	0	2	169.25	163	172	4	NA	0	NA	0	NA	0	169.25	4	0.4	0	0.285714	0.4	NA	0.8	0.166667	0	0.125	0.4	0	0.285714	NA	NA	NA	0.285714	2.95421	0	2.95421	2.95421	2.95421	5.90842	1.4771	0	1.4771
r324	1	0	1	0	0	0	0	0	0	3	0	3	73.5	73	74	4	NA	0	NA	0	NA	0	73.5	4	0.333333	NA	0.333333	0	NA	0	0	NA	0	3	NA	3	NA	NA	NA	0.333333	3.40136	0	3.40136	0	0	0	0	0	0
r325	0	0	0	0	0	0	0	0	0	2	0	2	121	121	121	3	NA	0	NA	0	NA	0	121	3	0	NA	0	0	NA	0	0	NA	0	NA	NA	NA	NA	NA	NA	0	0	0	0	0	0	0	0	0	0
r326	13	2	15	0	0	0	1	0	1	1	0	1	641.25	636	644	4	NA	0	641.25	4	NA	0	NA	0	6.5	NA	7.5	0	0	0	0.0714286	0	0.0625	0.0714286	0	0.0625	NA	7.5	NA	NA	5.06823	0.779727	5.84795	0	0	0	0.389864	0	0.389864
r327	27	10	37	8	18	26	8	17	25	21	5	26	418.5	411	421	4	NA	0	NA	0	418.5	4	NA	0	0.72973	0.25	0.480519	0.142857	0.5625	0.295455	0.142857	0.515152	0.280899	0.488372	0.111111	0.295455	NA	NA	0.480519	NA	16.129	5.97372	22.1027	4.77897	10.7527	15.5317	4.77897	10.1553	14.9343
r328	0	0	0	2	0	2	0	0	0	0	0	0	72.5	72	73	4	NA	0	NA	0	NA	0	72.5	4	0	NA	0	NA	NA	NA	0	NA	0	0	NA	0	NA	NA	NA	0	0	0	0	6.89655	0	6.89655	0	0	0
r329	16	2	18	0	1	1	3	0	3	0	3	3	163.5	162	164	4	NA	0	NA	0	NA	0	163.5	4	5.33333	0.5	2.57143	0	0.2	0.0416667	0.1875	0	0.136364	0	1	0.136364	NA	NA	NA	2.57143	24.4648	3.0581	27.5229	0	1.52905	1.52905	4.58716	0	4.58716
r32	0	0	0	0	0	0	0	0	0	0	0	0	NA	Seq_Length	0	NA	0	NA	0	NA	0	NA	0	NA	NA	NA	NA	NA	NA	NA	NA	NA	NA	NA	NA	NA	NA	NA	NA	NA	NA	NA	NA	NA	NA	NA	NA	NA	NA
r330	263	7	270	12	3	15	30	19	49	20	14	34	1138.6	1135	1142	5	1138.6	5	NA	0	NA	0	NA	0	4.24194	0.194444	2.7551	0.0383387	0.075	0.0424929	0.101695	0.791667	0.153605	0.0655738	0.482759	0.101796	2.7551	NA	NA	NA	46.1971	1.22958	47.4267	2.10785	0.526963	2.63481	5.26963	3.33743	8.60706
r331	2	0	2	0	0	0	0	2	2	1	1	2	160	160	160	6	NA	0	NA	0	NA	0	160	6	2	0	0.5	0	0	0	0	2	0.5	0.5	0.5	0.5	NA	NA	NA	0.5	2.08333	0	2.08333	0	0	0	0	2.08333	2.08333
r332	9	3	12	0	3	3	3	0	3	0	0	0	108	108	108	4	NA	0	NA	0	NA	0	108	4	3	1	2	0	1	0.2	0.333333	0	0.2	0	0	0	NA	NA	NA	2	20.8333	6.94444	27.7778	0	6.94444	6.94444	6.94444	0	6.94444
r333	0	0	0	0	0	0	0	0	0	0	0	0	246	246	246	3	NA	0	NA	0	246	3	NA	0	NA	NA	NA	NA	NA	NA	NA	NA	NA	NA	NA	NA	NA	NA	NA	NA	0	0	0	0	0	0	0	0	0
r334	77	17	94	7	3	10	2	8	10	37	13	50	50.2742	48	53	62	NA	0	NA	0	NA	0	50.2742	62	1.67391	0.708333	1.34286	0.0603448	0.0789474	0.0649351	0.0165289	0.242424	0.0649351	0.430233	0.464286	0.438596	NA	NA	NA	1.34286	24.7032	5.45396	30.1572	2.24575	0.962464	3.20821	0.641643	2.56657	3.20821
r335	1	0	1	0	0	0	1	1	2	0	0	0	66.25	64	67	4	NA	0	NA	0	NA	0	66.25	4	1	0	0.5	0	0	0	1	NA	2	0	0	0	NA	NA	NA	0.5	3.77358	0	3.77358	0	0	0	3.77358	3.77358	7.54717
r336	8	2	10	3	4	7	1	5	6	1	1	2	155	153	156	4	NA	0	NA	0	NA	0	155	4	1.6	0.2	0.666667	0.3	0.5	0.388889	0.0833333	0.714286	0.315789	0.0833333	0.0909091	0.0869565	NA	NA	NA	0.666667	12.9032	3.22581	16.129	4.83871	6.45161	11.2903	1.6129	8.06452	9.67742
r337	3	3	6	2	1	3	3	0	3	0	7	7	273.5	268	281	4	NA	0	NA	0	273.5	4	NA	0	0.6	0.375	0.461538	0.333333	0.1	0.1875	0.6	0	0.1875	0	1.75	0.583333	NA	NA	0.461538	NA	2.74223	2.74223	5.48446	1.82815	0.914077	2.74223	2.74223	0	2.74223
r338	26	37	63	9	23	32	30	1	31	4	1	5	176.429	173	179	21	NA	0	NA	0	NA	0	176.429	21	0.604651	1.48	0.926471	0.15	0.589744	0.323232	0.769231	0.0163934	0.31	0.0615385	0.0163934	0.0396825	NA	NA	NA	0.926471	7.01754	9.9865	17.004	2.42915	6.20783	8.63698	8.09717	0.269906	8.36707
r339	2	1	3	0	0	0	3	0	3	0	0	0	213	211	214	3	NA	0	NA	0	213	3	NA	0	0.666667	NA	1	0	0	0	1.5	0	1	0	0	0	NA	NA	1	NA	3.12989	1.56495	4.69484	0	0	0	4.69484	0	4.69484
r33	168	52	220	46	2	48	45	48	93	2	1	3	3188.09	3088	3197	23	3188.09	23	NA	0	NA	0	NA	0	1.80645	1.01961	1.52778	0.213953	0.019802	0.151899	0.208333	0.872727	0.343173	0.00772201	0.00980392	0.00831025	1.52778	NA	NA	NA	2.29114	0.709162	3.0003	0.627335	0.0272755	0.654611	0.613698	0.654611	1.26831
r340	51	2	53	7	8	15	6	11	17	3	1	4	369	367	371	4	NA	0	NA	0	369	4	NA	0	3.1875	0.1	1.47222	0.116667	0.571429	0.202703	0.0983607	1	0.236111	0.046875	0.047619	0.0470588	NA	NA	1.47222	NA	34.5528	1.35501	35.9079	4.74255	5.42005	10.1626	4.06504	7.45257	11.5176
r341	43	6	49	7	4	11	20	12	32	20	12	32	293.167	285	297	6	NA	0	NA	0	293.167	6	NA	0	0.914894	0.214286	0.653333	0.0843373	0.133333	0.0973451	0.285714	0.545455	0.347826	0.285714	0.545455	0.347826	NA	NA	0.653333	NA	24.4457	3.41103	27.8567	3.97953	2.27402	6.25355	11.3701	6.82206	18.1922
r342	8	1	9	1	0	1	0	0	0	3	0	3	134.5	133	136	4	NA	0	NA	0	NA	0	134.5	4	2	NA	2.25	0.0909091	0	0.0833333	0	0	0	0.333333	0	0.3	NA	NA	NA	2.25	14.8699	1.85874	16.7286	1.85874	0	1.85874	0	0	0
r343	3	0	3	1	0	1	2	3	5	1	2	3	135.25	133	136	4	NA	0	NA	0	NA	0	135.25	4	0.75	0	0.333333	0.166667	0	0.0909091	0.4	1.5	0.714286	0.166667	0.666667	0.333333	NA	NA	NA	0.333333	5.54529	0	5.54529	1.84843	0	1.84843	3.69686	5.54529	9.24214
r344	6	7	13	6	2	8	5	3	8	2	7	9	121.833	116	129	6	NA	0	NA	0	NA	0	121.833	6	0.461538	0.583333	0.52	0.461538	0.117647	0.266667	0.357143	0.1875	0.266667	0.117647	0.583333	0.310345	NA	NA	NA	0.52	8.20793	9.57592	17.7839	8.20793	2.73598	10.9439	6.83995	4.10397	10.9439
r345	19	2	21	1	0	1	4	1	5	3	0	3	294	288	296	4	NA	0	NA	0	294	4	NA	0	2.375	2	2.33333	0.0384615	0	0.0344828	0.173913	0.5	0.2	0.125	0	0.111111	NA	NA	2.33333	NA	16.1565	1.70068	17.8571	0.85034	0	0.85034	3.40136	0.85034	4.2517
r346	0	0	0	6	1	7	10	0	10	0	1	1	65.6667	65	66	6	NA	0	NA	0	NA	0	65.6667	6	0	0	0	0.6	1	0.636364	1.66667	0	1.25	0	1	0.0588235	NA	NA	NA	0	0	0	0	15.2284	2.53807	17.7665	25.3807	0	25.3807
r347	4	1	5	1	1	2	2	0	2	0	1	1	155.25	153	156	4	NA	0	NA	0	NA	0	155.25	4	1.33333	0.5	1	0.166667	0.5	0.25	0.4	0	0.25	0	0.5	0.111111	NA	NA	NA	1	6.44122	1.61031	8.05153	1.61031	1.61031	3.22061	3.22061	0	3.22061
r348	110	45	155	16	15	31	50	48	98	43	13	56	1000.8	974	1015	5	1013.67	3	981.5	2	NA	0	NA	0	1.00917	0.592105	0.837838	0.0788177	0.141509	0.100324	0.295858	0.657534	0.404959	0.244318	0.12037	0.197183	1.81818	0.531915	NA	NA	21.9824	8.99281	30.9752	3.19744	2.9976	6.19504	9.99201	9.59233	19.5843
r349	0	0	0	0	0	0	0	0	0	0	0	0	135	135	135	3	NA	0	NA	0	NA	0	135	3	NA	NA	NA	NA	NA	NA	NA	NA	NA	NA	NA	NA	NA	NA	NA	NA	0	0	0	0	0	0	0	0	0
r34	68	4	72	4	10	14	6	4	10	6	2	8	190.615	172	202	91	NA	0	NA	0	202	1	190.489	90	4.25	0.25	2.25	0.05	1	0.155556	0.0769231	0.25	0.106383	0.0769231	0.111111	0.0833333	NA	NA	NA	2.25	3.92021	0.230601	4.15081	0.230601	0.576502	0.807103	0.345901	0.230601	0.576502
r350	0	0	0	0	0	0	0	0	0	0	0	0	112	112	112	3	NA	0	NA	0	NA	0	112	3	NA	NA	NA	NA	NA	NA	NA	NA	NA	NA	NA	NA	NA	NA	NA	NA	0	0	0	0	0	0	0	0	0
r351	30	15	45	16	11	27	23	14	37	16	7	23	1053	1047	1061	3	1053	3	NA	0	NA	0	NA	0	0.545455	0.46875	0.517241	0.231884	0.305556	0.257143	0.370968	0.424242	0.389474	0.231884	0.175	0.211009	0.517241	NA	NA	NA	9.49668	4.74834	14.245	5.06489	3.48211	8.54701	7.28079	4.43178	11.7126
r352	2	0	2	0	0	0	1	0	1	0	1	1	61	61	61	5	NA	0	NA	0	NA	0	61	5	2	0	1	0	0	0	0.5	0	0.333333	0	NA	0.333333	NA	NA	NA	1	6.55738	0	6.55738	0	0	0	3.27869	0	3.27869
r353	23	1	24	3	4	7	7	0	7	4	0	4	279.833	263	289	6	NA	0	NA	0	279.833	6	NA	0	1.64286	0.25	1.33333	0.0882353	4	0.2	0.233333	0	0.2	0.121212	0	0.105263	NA	NA	1.33333	NA	13.6986	0.595593	14.2942	1.78678	2.38237	4.16915	4.16915	0	4.16915
r354	3	0	3	4	1	5	0	0	0	0	0	0	109	106	110	4	NA	0	NA	0	NA	0	109	4	0.75	0	0.6	1.33333	NA	1.66667	0	0	0	0	0	0	NA	NA	NA	0.6	6.88073	0	6.88073	9.17431	2.29358	11.4679	0	0	0
r355	7	0	7	3	0	3	0	2	2	1	4	5	90.75	88	95	4	NA	0	NA	0	NA	0	90.75	4	1.75	0	0.7	0.375	0	0.214286	0	0.5	0.133333	0.1	2	0.416667	NA	NA	NA	0.7	19.2837	0	19.2837	8.26446	0	8.26446	0	5.50964	5.50964
r356	8	0	8	1	0	1	6	0	6	2	3	5	178	176	180	4	NA	0	NA	0	NA	0	178	4	0.888889	0	0.666667	0.0625	0	0.0526316	0.545455	0	0.428571	0.133333	NA	0.333333	NA	NA	NA	0.666667	11.236	0	11.236	1.40449	0	1.40449	8.42697	0	8.42697
r357	17	12	29	3	5	8	17	13	30	15	7	22	469	460	472	4	NA	0	NA	0	469	4	NA	0	0.485714	0.48	0.483333	0.0612245	0.15625	0.0987654	0.485714	0.541667	0.508475	0.405405	0.233333	0.328358	NA	NA	0.483333	NA	9.06183	6.39659	15.4584	1.59915	2.66525	4.26439	9.06183	6.92964	15.9915
r358	0	0	0	0	0	0	1	0	1	0	1	1	68	68	68	4	NA	0	NA	0	NA	0	68	4	0	0	0	0	0	0	NA	0	1	0	NA	1	NA	NA	NA	0	0	0	0	0	0	0	3.67647	0	3.67647
r359	0	1	1	0	0	0	0	0	0	2	0	2	116.5	112	118	4	NA	0	NA	0	NA	0	116.5	4	0	NA	0.5	0	0	0	0	0	0	NA	0	2	NA	NA	NA	0.5	0	2.14592	2.14592	0	0	0	0	0	0
r35	2	0	2	3	0	3	5	0	5	0	0	0	6838.71	6764	6881	7	6838.71	7	NA	0	NA	0	NA	0	0.25	NA	0.25	0.428571	NA	0.428571	1	NA	1	0	NA	0	0.25	NA	NA	NA	0.0417789	0	0.0417789	0.0626684	0	0.0626684	0.104447	0	0.104447
r360	13	9	22	2	0	2	8	2	10	2	3	5	164.25	156	167	4	NA	0	NA	0	NA	0	164.25	4	1.08333	1.8	1.29412	0.0869565	0	0.0540541	0.470588	0.166667	0.344828	0.0869565	0.272727	0.147059	NA	NA	NA	1.29412	19.7869	13.6986	33.4855	3.04414	0	3.04414	12.1766	3.04414	15.2207
r361	4	1	5	0	0	0	0	0	0	0	0	0	85.5	84	86	4	NA	0	NA	0	NA	0	85.5	4	NA	NA	NA	0	0	0	0	0	0	0	0	0	NA	NA	NA	NA	11.6959	2.92398	14.6199	0	0	0	0	0	0
r362	0	0	0	0	0	0	0	0	0	0	0	0	234.667	234	235	3	NA	0	NA	0	234.667	3	NA	0	NA	NA	NA	NA	NA	NA	NA	NA	NA	NA	NA	NA	NA	NA	NA	NA	0	0	0	0	0	0	0	0	0
r363	0	0	0	0	0	0	0	0	0	0	0	0	617	617	617	3	NA	0	617	3	NA	0	NA	0	NA	NA	NA	NA	NA	NA	NA	NA	NA	NA	NA	NA	NA	NA	NA	NA	0	0	0	0	0	0	0	0	0
r364	0	0	0	0	0	0	0	0	0	0	0	0	56	56	56	3	NA	0	NA	0	NA	0	56	3	NA	NA	NA	NA	NA	NA	NA	NA	NA	NA	NA	NA	NA	NA	NA	NA	0	0	0	0	0	0	0	0	0
r365	0	0	0	0	0	0	0	0	0	0	0	0	54	54	54	3	NA	0	NA	0	NA	0	54	3	NA	NA	NA	NA	NA	NA	NA	NA	NA	NA	NA	NA	NA	NA	NA	NA	0	0	0	0	0	0	0	0	0
r366	2	0	2	0	2	2	1	0	1	0	0	0	133	127	135	4	NA	0	NA	0	NA	0	133	4	2	0	0.666667	0	NA	0.666667	0.5	0	0.25	0	0	0	NA	NA	NA	0.666667	3.7594	0	3.7594	0	3.7594	3.7594	1.8797	0	1.8797
r367	1	0	1	1	0	1	0	0	0	0	0	0	89	89	89	3	NA	0	NA	0	NA	0	89	3	1	NA	1	1	NA	1	0	NA	0	0	NA	0	NA	NA	NA	1	3.74532	0	3.74532	3.74532	0	3.74532	0	0	0
r368	4	1	5	0	2	2	0	1	1	3	1	4	90.6	89	91	5	NA	0	NA	0	NA	0	90.6	5	1.33333	0.25	0.714286	0	0.666667	0.2	0	0.25	0.0909091	0.75	0.25	0.5	NA	NA	NA	0.714286	8.83002	2.20751	11.0375	0	4.41501	4.41501	0	2.20751	2.20751
r369	3	3	6	0	0	0	2	0	2	2	2	4	95.5	91	97	4	NA	0	NA	0	NA	0	95.5	4	0.75	1.5	1	0	0	0	0.4	0	0.2	0.4	0.666667	0.5	NA	NA	NA	1	7.8534	7.8534	15.7068	0	0	0	5.2356	0	5.2356
r36	13	28	41	80	1	81	13	51	64	0	1	1	201.132	190	203	53	NA	0	NA	0	201.935	46	195.857	7	0.139785	0.528302	0.280822	3.07692	0.0125	0.764151	0.139785	1.7	0.520325	0	0.0125	0.00537634	NA	NA	0.208	0.714286	1.21951	2.62664	3.84615	7.50469	0.0938086	7.5985	1.21951	4.78424	6.00375
r370	0	0	0	0	0	0	0	0	0	0	0	0	50.25	48	51	4	NA	0	NA	0	NA	0	50.25	4	NA	NA	NA	NA	NA	NA	NA	NA	NA	NA	NA	NA	NA	NA	NA	NA	0	0	0	0	0	0	0	0	0
r371	0	0	0	0	0	0	1	0	1	1	1	2	66	66	66	3	NA	0	NA	0	NA	0	66	3	0	0	0	0	0	0	1	0	0.5	1	NA	2	NA	NA	NA	0	0	0	0	0	0	0	5.05051	0	5.05051
r372	21	0	21	4	0	4	0	0	0	16	2	18	189.25	187	190	4	NA	0	NA	0	NA	0	189.25	4	1.05	0	0.954545	0.108108	0	0.102564	0	0	0	0.64	NA	0.72	NA	NA	NA	0.954545	27.7411	0	27.7411	5.28402	0	5.28402	0	0	0
r373	0	0	0	0	2	2	0	2	2	4	0	4	117	117	117	3	NA	0	NA	0	NA	0	117	3	0	0	0	0	1	0.333333	0	1	0.333333	NA	0	1	NA	NA	NA	0	0	0	0	0	5.69801	5.69801	0	5.69801	5.69801
r374	2	2	4	0	0	0	3	0	3	0	0	0	68	68	68	3	NA	0	NA	0	NA	0	68	3	0.666667	NA	1.33333	0	0	0	1.5	0	0.75	0	0	0	NA	NA	NA	1.33333	9.80392	9.80392	19.6078	0	0	0	14.7059	0	14.7059
r375	23	2	25	2	0	2	3	0	3	5	1	6	174	174	174	4	NA	0	NA	0	NA	0	174	4	2.3	2	2.27273	0.0645161	0	0.0588235	0.1	0	0.0909091	0.178571	0.5	0.2	NA	NA	NA	2.27273	33.046	2.87356	35.9195	2.87356	0	2.87356	4.31034	0	4.31034
r376	6	0	6	2	4	6	6	2	8	2	4	6	112	112	112	4	NA	0	NA	0	NA	0	112	4	0.6	0	0.3	0.142857	0.666667	0.3	0.6	0.25	0.444444	0.142857	0.666667	0.3	NA	NA	NA	0.3	13.3929	0	13.3929	4.46429	8.92857	13.3929	13.3929	4.46429	17.8571
r377	162	433	595	0	37	37	297	0	297	449	127	576	215.56	115	256	266	NA	0	NA	0	254.157	185	127.407	81	0.217158	2.64024	0.653846	0	0.0660714	0.0252044	0.486088	0	0.245861	0.978214	0.270213	0.620022	NA	NA	0.375	1.17296	2.8253	7.55158	10.3769	0	0.645285	0.645285	5.17972	0	5.17972
r378	18	7	25	6	0	6	5	5	10	7	1	8	92.1429	87	96	7	NA	0	NA	0	NA	0	92.1429	7	1	1.16667	1.04167	0.2	0	0.139535	0.16129	0.625	0.25641	0.241379	0.0833333	0.195122	NA	NA	NA	1.04167	27.907	10.8527	38.7597	9.30233	0	9.30233	7.75194	7.75194	15.5039
r379	0	0	0	0	0	0	0	0	0	0	0	0	72	72	72	3	NA	0	NA	0	NA	0	72	3	NA	NA	NA	NA	NA	NA	NA	NA	NA	NA	NA	NA	NA	NA	NA	NA	0	0	0	0	0	0	0	0	0
r37	0	0	0	0	0	0	0	0	0	0	0	0	NA	Seq_Length	0	NA	0	NA	0	NA	0	NA	0	NA	NA	NA	NA	NA	NA	NA	NA	NA	NA	NA	NA	NA	NA	NA	NA	NA	NA	NA	NA	NA	NA	NA	NA	NA	NA
r380	0	0	0	0	0	0	0	0	0	0	0	0	50	50	50	3	NA	0	NA	0	NA	0	50	3	NA	NA	NA	NA	NA	NA	NA	NA	NA	NA	NA	NA	NA	NA	NA	NA	0	0	0	0	0	0	0	0	0
r381	43	0	43	0	0	0	11	0	11	1	0	1	520	517	521	4	NA	0	520	4	NA	0	NA	0	3.58333	NA	3.58333	0	NA	0	0.25	NA	0.25	0.0185185	NA	0.0185185	NA	3.58333	NA	NA	20.6731	0	20.6731	0	0	0	5.28846	0	5.28846
r382	0	0	0	0	0	0	0	0	0	0	0	0	152	152	152	3	NA	0	NA	0	NA	0	152	3	NA	NA	NA	NA	NA	NA	NA	NA	NA	NA	NA	NA	NA	NA	NA	NA	0	0	0	0	0	0	0	0	0
r383	0	0	0	0	0	0	0	0	0	0	0	0	439	439	439	3	NA	0	NA	0	439	3	NA	0	NA	NA	NA	NA	NA	NA	NA	NA	NA	NA	NA	NA	NA	NA	NA	NA	0	0	0	0	0	0	0	0	0
r384	0	0	0	0	0	0	0	0	0	0	0	0	159	159	159	3	NA	0	NA	0	NA	0	159	3	NA	NA	NA	NA	NA	NA	NA	NA	NA	NA	NA	NA	NA	NA	NA	NA	0	0	0	0	0	0	0	0	0
r385	0	0	0	0	0	0	0	0	0	0	0	0	78	78	78	3	NA	0	NA	0	NA	0	78	3	NA	NA	NA	NA	NA	NA	NA	NA	NA	NA	NA	NA	NA	NA	NA	NA	0	0	0	0	0	0	0	0	0
r386	0	0	0	0	0	0	0	0	0	0	0	0	219	219	219	3	NA	0	NA	0	219	3	NA	0	NA	NA	NA	NA	NA	NA	NA	NA	NA	NA	NA	NA	NA	NA	NA	NA	0	0	0	0	0	0	0	0	0
r387	0	0	0	0	0	0	0	0	0	0	0	0	2974	2974	2974	3	2974	3	NA	0	NA	0	NA	0	NA	NA	NA	NA	NA	NA	NA	NA	NA	NA	NA	NA	NA	NA	NA	NA	0	0	0	0	0	0	0	0	0
r388	0	0	0	0	0	0	0	0	0	0	0	0	267	267	267	3	NA	0	NA	0	267	3	NA	0	NA	NA	NA	NA	NA	NA	NA	NA	NA	NA	NA	NA	NA	NA	NA	NA	0	0	0	0	0	0	0	0	0
r389	0	0	0	0	0	0	0	0	0	0	0	0	245	245	245	3	NA	0	NA	0	245	3	NA	0	NA	NA	NA	NA	NA	NA	NA	NA	NA	NA	NA	NA	NA	NA	NA	NA	0	0	0	0	0	0	0	0	0
r38	288	1	289	16	1	17	21	2	23	11	6	17	5338.62	5326	5343	8	5338.62	8	NA	0	NA	0	NA	0	6	0.111111	5.07018	0.05	0.111111	0.0516717	0.0666667	0.25	0.0712074	0.0338462	1.5	0.0516717	5.07018	NA	NA	NA	6.74331	0.0234143	6.76672	0.374628	0.0234143	0.398043	0.4917	0.0468285	0.538528
r390	0	0	0	0	0	0	0	0	0	0	0	0	1414	1414	1414	3	1414	3	NA	0	NA	0	NA	0	NA	NA	NA	NA	NA	NA	NA	NA	NA	NA	NA	NA	NA	NA	NA	NA	0	0	0	0	0	0	0	0	0
r391	0	0	0	0	0	0	0	0	0	0	0	0	119	119	119	3	NA	0	NA	0	NA	0	119	3	NA	NA	NA	NA	NA	NA	NA	NA	NA	NA	NA	NA	NA	NA	NA	NA	0	0	0	0	0	0	0	0	0
r392	0	0	0	0	0	0	0	0	0	0	0	0	361	361	361	3	NA	0	NA	0	361	3	NA	0	NA	NA	NA	NA	NA	NA	NA	NA	NA	NA	NA	NA	NA	NA	NA	NA	0	0	0	0	0	0	0	0	0
r393	0	0	0	0	0	0	0	0	0	0	0	0	773	773	773	3	NA	0	773	3	NA	0	NA	0	NA	NA	NA	NA	NA	NA	NA	NA	NA	NA	NA	NA	NA	NA	NA	NA	0	0	0	0	0	0	0	0	0
r394	0	0	0	0	0	0	0	0	0	0	0	0	654	654	654	3	NA	0	654	3	NA	0	NA	0	NA	NA	NA	NA	NA	NA	NA	NA	NA	NA	NA	NA	NA	NA	NA	NA	0	0	0	0	0	0	0	0	0
r395	0	0	0	0	0	0	0	0	0	0	0	0	1065	1065	1065	3	1065	3	NA	0	NA	0	NA	0	NA	NA	NA	NA	NA	NA	NA	NA	NA	NA	NA	NA	NA	NA	NA	NA	0	0	0	0	0	0	0	0	0
r396	0	0	0	0	0	0	0	0	0	0	0	0	3038	3038	3038	3	3038	3	NA	0	NA	0	NA	0	NA	NA	NA	NA	NA	NA	NA	NA	NA	NA	NA	NA	NA	NA	NA	NA	0	0	0	0	0	0	0	0	0
r397	0	0	0	0	0	0	0	0	0	0	0	0	1363	1363	1363	3	1363	3	NA	0	NA	0	NA	0	NA	NA	NA	NA	NA	NA	NA	NA	NA	NA	NA	NA	NA	NA	NA	NA	0	0	0	0	0	0	0	0	0
r398	0	0	0	0	0	0	0	0	0	0	0	0	312	312	312	3	NA	0	NA	0	312	3	NA	0	NA	NA	NA	NA	NA	NA	NA	NA	NA	NA	NA	NA	NA	NA	NA	NA	0	0	0	0	0	0	0	0	0
r399	0	0	0	0	0	0	0	0	0	0	0	0	700	700	700	3	NA	0	700	3	NA	0	NA	0	NA	NA	NA	NA	NA	NA	NA	NA	NA	NA	NA	NA	NA	NA	NA	NA	0	0	0	0	0	0	0	0	0
r39	37	49	86	25	94	119	33	1	34	38	87	125	171.306	158	180	62	NA	0	NA	0	NA	0	171.306	62	0.385417	0.269231	0.309353	0.231481	0.686131	0.485714	0.33	0.00434783	0.10303	0.4	0.604167	0.523013	NA	NA	NA	0.309353	3.48366	4.6135	8.09717	2.35383	8.85039	11.2042	3.10705	0.0941531	3.20121
r3	0	0	0	0	0	0	0	0	0	0	0	0	NA	Seq_Length	0	NA	0	NA	0	NA	0	NA	0	NA	NA	NA	NA	NA	NA	NA	NA	NA	NA	NA	NA	NA	NA	NA	NA	NA	NA	NA	NA	NA	NA	NA	NA	NA	NA
r400	0	0	0	0	0	0	0	0	0	0	0	0	526	526	526	3	NA	0	526	3	NA	0	NA	0	NA	NA	NA	NA	NA	NA	NA	NA	NA	NA	NA	NA	NA	NA	NA	NA	0	0	0	0	0	0	0	0	0
r401	0	0	0	0	0	0	0	0	0	0	0	0	383	383	383	3	NA	0	NA	0	383	3	NA	0	NA	NA	NA	NA	NA	NA	NA	NA	NA	NA	NA	NA	NA	NA	NA	NA	0	0	0	0	0	0	0	0	0
r402	0	0	0	0	0	0	0	0	0	0	0	0	766	766	766	3	NA	0	766	3	NA	0	NA	0	NA	NA	NA	NA	NA	NA	NA	NA	NA	NA	NA	NA	NA	NA	NA	NA	0	0	0	0	0	0	0	0	0
r403	0	0	0	0	0	0	0	0	0	0	0	0	97	97	97	3	NA	0	NA	0	NA	0	97	3	NA	NA	NA	NA	NA	NA	NA	NA	NA	NA	NA	NA	NA	NA	NA	NA	0	0	0	0	0	0	0	0	0
r404	0	0	0	0	0	0	0	0	0	0	0	0	746	746	746	3	NA	0	746	3	NA	0	NA	0	NA	NA	NA	NA	NA	NA	NA	NA	NA	NA	NA	NA	NA	NA	NA	NA	0	0	0	0	0	0	0	0	0
r405	0	0	0	0	0	0	0	0	0	0	0	0	2731	2731	2731	3	2731	3	NA	0	NA	0	NA	0	NA	NA	NA	NA	NA	NA	NA	NA	NA	NA	NA	NA	NA	NA	NA	NA	0	0	0	0	0	0	0	0	0
r406	0	0	0	0	0	0	0	0	0	0	0	0	331	331	331	3	NA	0	NA	0	331	3	NA	0	NA	NA	NA	NA	NA	NA	NA	NA	NA	NA	NA	NA	NA	NA	NA	NA	0	0	0	0	0	0	0	0	0
r407	0	0	0	0	0	0	0	0	0	0	0	0	1742	1742	1742	3	1742	3	NA	0	NA	0	NA	0	NA	NA	NA	NA	NA	NA	NA	NA	NA	NA	NA	NA	NA	NA	NA	NA	0	0	0	0	0	0	0	0	0
r408	0	0	0	0	0	0	0	0	0	0	0	0	1046	1046	1046	3	1046	3	NA	0	NA	0	NA	0	NA	NA	NA	NA	NA	NA	NA	NA	NA	NA	NA	NA	NA	NA	NA	NA	0	0	0	0	0	0	0	0	0
r409	0	0	0	0	0	0	0	0	0	0	0	0	1075	1075	1075	3	1075	3	NA	0	NA	0	NA	0	NA	NA	NA	NA	NA	NA	NA	NA	NA	NA	NA	NA	NA	NA	NA	NA	0	0	0	0	0	0	0	0	0
r40	129	78	207	52	67	119	71	18	89	119	61	180	6078.91	5717	6240	22	6078.91	22	NA	0	NA	0	NA	0	0.533058	0.534247	0.533505	0.163009	0.426752	0.25	0.236667	0.0873786	0.175889	0.472222	0.374233	0.433735	0.533505	NA	NA	NA	0.964587	0.583239	1.54783	0.388826	0.500987	0.889813	0.530897	0.134594	0.66549
r410	0	0	0	0	0	0	0	0	0	0	0	0	1173	1173	1173	3	1173	3	NA	0	NA	0	NA	0	NA	NA	NA	NA	NA	NA	NA	NA	NA	NA	NA	NA	NA	NA	NA	NA	0	0	0	0	0	0	0	0	0
r411	0	0	0	0	0	0	0	0	0	0	0	0	183	183	183	3	NA	0	NA	0	NA	0	183	3	NA	NA	NA	NA	NA	NA	NA	NA	NA	NA	NA	NA	NA	NA	NA	NA	0	0	0	0	0	0	0	0	0
r412	0	0	0	0	0	0	0	0	0	0	0	0	1147	1147	1147	3	1147	3	NA	0	NA	0	NA	0	NA	NA	NA	NA	NA	NA	NA	NA	NA	NA	NA	NA	NA	NA	NA	NA	0	0	0	0	0	0	0	0	0
r413	0	0	0	0	0	0	0	0	0	0	0	0	556	556	556	3	NA	0	556	3	NA	0	NA	0	NA	NA	NA	NA	NA	NA	NA	NA	NA	NA	NA	NA	NA	NA	NA	NA	0	0	0	0	0	0	0	0	0
r414	0	0	0	0	0	0	0	0	0	0	0	0	1235	1235	1235	3	1235	3	NA	0	NA	0	NA	0	NA	NA	NA	NA	NA	NA	NA	NA	NA	NA	NA	NA	NA	NA	NA	NA	0	0	0	0	0	0	0	0	0
r415	0	0	0	0	0	0	0	0	0	0	0	0	257	257	257	3	NA	0	NA	0	257	3	NA	0	NA	NA	NA	NA	NA	NA	NA	NA	NA	NA	NA	NA	NA	NA	NA	NA	0	0	0	0	0	0	0	0	0
r416	0	0	0	0	0	0	0	0	0	0	0	0	88	88	88	3	NA	0	NA	0	NA	0	88	3	NA	NA	NA	NA	NA	NA	NA	NA	NA	NA	NA	NA	NA	NA	NA	NA	0	0	0	0	0	0	0	0	0
r417	0	0	0	0	0	0	0	0	0	0	0	0	77	77	77	3	NA	0	NA	0	NA	0	77	3	NA	NA	NA	NA	NA	NA	NA	NA	NA	NA	NA	NA	NA	NA	NA	NA	0	0	0	0	0	0	0	0	0
r418	0	0	0	0	0	0	0	0	0	0	0	0	63	63	63	3	NA	0	NA	0	NA	0	63	3	NA	NA	NA	NA	NA	NA	NA	NA	NA	NA	NA	NA	NA	NA	NA	NA	0	0	0	0	0	0	0	0	0
r419	0	0	0	0	0	0	0	0	0	0	0	0	118	118	118	3	NA	0	NA	0	NA	0	118	3	NA	NA	NA	NA	NA	NA	NA	NA	NA	NA	NA	NA	NA	NA	NA	NA	0	0	0	0	0	0	0	0	0
r41	178	24	202	4	1	5	57	14	71	1	5	6	2097.58	1961	2104	38	2097.58	38	NA	0	NA	0	NA	0	2.87097	1.2	2.46341	0.0169492	0.0232558	0.0179211	0.311475	0.466667	0.333333	0.0041841	0.128205	0.0215827	2.46341	NA	NA	NA	2.23315	0.301099	2.53425	0.0501832	0.0125458	0.062729	0.71511	0.175641	0.890751
r420	0	0	0	0	0	0	0	0	0	0	0	0	327	327	327	3	NA	0	NA	0	327	3	NA	0	NA	NA	NA	NA	NA	NA	NA	NA	NA	NA	NA	NA	NA	NA	NA	NA	0	0	0	0	0	0	0	0	0
r421	0	0	0	0	0	0	0	0	0	0	0	0	1293	1293	1293	3	1293	3	NA	0	NA	0	NA	0	NA	NA	NA	NA	NA	NA	NA	NA	NA	NA	NA	NA	NA	NA	NA	NA	0	0	0	0	0	0	0	0	0
r422	0	0	0	0	0	0	0	0	0	0	0	0	98	98	98	3	NA	0	NA	0	NA	0	98	3	NA	NA	NA	NA	NA	NA	NA	NA	NA	NA	NA	NA	NA	NA	NA	NA	0	0	0	0	0	0	0	0	0
r423	0	0	0	0	0	0	0	0	0	0	0	0	763	763	763	3	NA	0	763	3	NA	0	NA	0	NA	NA	NA	NA	NA	NA	NA	NA	NA	NA	NA	NA	NA	NA	NA	NA	0	0	0	0	0	0	0	0	0
r424	0	0	0	0	0	0	0	0	0	0	0	0	295	295	295	3	NA	0	NA	0	295	3	NA	0	NA	NA	NA	NA	NA	NA	NA	NA	NA	NA	NA	NA	NA	NA	NA	NA	0	0	0	0	0	0	0	0	0
r425	0	0	0	0	0	0	0	0	0	0	0	0	2978	2978	2978	3	2978	3	NA	0	NA	0	NA	0	NA	NA	NA	NA	NA	NA	NA	NA	NA	NA	NA	NA	NA	NA	NA	NA	0	0	0	0	0	0	0	0	0
r426	0	0	0	0	0	0	0	0	0	0	0	0	53	53	53	3	NA	0	NA	0	NA	0	53	3	NA	NA	NA	NA	NA	NA	NA	NA	NA	NA	NA	NA	NA	NA	NA	NA	0	0	0	0	0	0	0	0	0
r427	0	0	0	0	0	0	0	0	0	0	0	0	1290	1290	1290	3	1290	3	NA	0	NA	0	NA	0	NA	NA	NA	NA	NA	NA	NA	NA	NA	NA	NA	NA	NA	NA	NA	NA	0	0	0	0	0	0	0	0	0
r428	0	0	0	0	0	0	0	0	0	0	0	0	102	102	102	3	NA	0	NA	0	NA	0	102	3	NA	NA	NA	NA	NA	NA	NA	NA	NA	NA	NA	NA	NA	NA	NA	NA	0	0	0	0	0	0	0	0	0
r429	0	0	0	0	0	0	0	0	0	0	0	0	54	54	54	3	NA	0	NA	0	NA	0	54	3	NA	NA	NA	NA	NA	NA	NA	NA	NA	NA	NA	NA	NA	NA	NA	NA	0	0	0	0	0	0	0	0	0
r42	0	0	0	0	0	0	0	0	0	0	0	0	NA	Seq_Length	0	NA	0	NA	0	NA	0	NA	0	NA	NA	NA	NA	NA	NA	NA	NA	NA	NA	NA	NA	NA	NA	NA	NA	NA	NA	NA	NA	NA	NA	NA	NA	NA	NA
r430	0	0	0	0	0	0	0	0	0	0	0	0	64	64	64	3	NA	0	NA	0	NA	0	64	3	NA	NA	NA	NA	NA	NA	NA	NA	NA	NA	NA	NA	NA	NA	NA	NA	0	0	0	0	0	0	0	0	0
r431	0	0	0	0	0	0	0	0	0	0	0	0	182	182	182	3	NA	0	NA	0	NA	0	182	3	NA	NA	NA	NA	NA	NA	NA	NA	NA	NA	NA	NA	NA	NA	NA	NA	0	0	0	0	0	0	0	0	0
r432	0	0	0	0	0	0	0	0	0	0	0	0	518	518	518	3	NA	0	518	3	NA	0	NA	0	NA	NA	NA	NA	NA	NA	NA	NA	NA	NA	NA	NA	NA	NA	NA	NA	0	0	0	0	0	0	0	0	0
r433	0	0	0	0	0	0	0	0	0	0	0	0	384	384	384	3	NA	0	NA	0	384	3	NA	0	NA	NA	NA	NA	NA	NA	NA	NA	NA	NA	NA	NA	NA	NA	NA	NA	0	0	0	0	0	0	0	0	0
r434	0	0	0	0	0	0	0	0	0	0	0	0	110	110	110	3	NA	0	NA	0	NA	0	110	3	NA	NA	NA	NA	NA	NA	NA	NA	NA	NA	NA	NA	NA	NA	NA	NA	0	0	0	0	0	0	0	0	0
r435	0	0	0	0	0	0	0	0	0	0	0	0	56	56	56	3	NA	0	NA	0	NA	0	56	3	NA	NA	NA	NA	NA	NA	NA	NA	NA	NA	NA	NA	NA	NA	NA	NA	0	0	0	0	0	0	0	0	0
r436	0	0	0	0	0	0	0	0	0	0	0	0	121	121	121	3	NA	0	NA	0	NA	0	121	3	NA	NA	NA	NA	NA	NA	NA	NA	NA	NA	NA	NA	NA	NA	NA	NA	0	0	0	0	0	0	0	0	0
r437	0	0	0	0	0	0	0	0	0	0	0	0	63	63	63	3	NA	0	NA	0	NA	0	63	3	NA	NA	NA	NA	NA	NA	NA	NA	NA	NA	NA	NA	NA	NA	NA	NA	0	0	0	0	0	0	0	0	0
r438	0	0	0	0	0	0	0	0	0	0	0	0	980	980	980	3	NA	0	980	3	NA	0	NA	0	NA	NA	NA	NA	NA	NA	NA	NA	NA	NA	NA	NA	NA	NA	NA	NA	0	0	0	0	0	0	0	0	0
r439	0	0	0	0	0	0	0	0	0	0	0	0	890	890	890	3	NA	0	890	3	NA	0	NA	0	NA	NA	NA	NA	NA	NA	NA	NA	NA	NA	NA	NA	NA	NA	NA	NA	0	0	0	0	0	0	0	0	0
r43	51	53	104	21	61	82	77	2	79	57	15	72	216.98	199	241	51	NA	0	NA	0	217.34	50	199	1	0.329032	0.679487	0.446352	0.113514	0.871429	0.321569	0.596899	0.0155039	0.306202	0.38255	0.12931	0.271698	NA	NA	0.455752	0.142857	4.60871	4.78945	9.39816	1.8977	5.51238	7.41008	6.95825	0.180734	7.13898
r440	0	0	0	0	0	0	0	0	0	0	0	0	173	173	173	3	NA	0	NA	0	NA	0	173	3	NA	NA	NA	NA	NA	NA	NA	NA	NA	NA	NA	NA	NA	NA	NA	NA	0	0	0	0	0	0	0	0	0
r441	0	0	0	0	0	0	0	0	0	0	0	0	188	188	188	3	NA	0	NA	0	NA	0	188	3	NA	NA	NA	NA	NA	NA	NA	NA	NA	NA	NA	NA	NA	NA	NA	NA	0	0	0	0	0	0	0	0	0
r442	0	0	0	0	0	0	0	0	0	0	0	0	266	266	266	3	NA	0	NA	0	266	3	NA	0	NA	NA	NA	NA	NA	NA	NA	NA	NA	NA	NA	NA	NA	NA	NA	NA	0	0	0	0	0	0	0	0	0
r443	0	0	0	0	0	0	0	0	0	0	0	0	292	292	292	3	NA	0	NA	0	292	3	NA	0	NA	NA	NA	NA	NA	NA	NA	NA	NA	NA	NA	NA	NA	NA	NA	NA	0	0	0	0	0	0	0	0	0
r444	0	0	0	0	0	0	0	0	0	0	0	0	394	394	394	3	NA	0	NA	0	394	3	NA	0	NA	NA	NA	NA	NA	NA	NA	NA	NA	NA	NA	NA	NA	NA	NA	NA	0	0	0	0	0	0	0	0	0
r445	0	0	0	0	0	0	0	0	0	0	0	0	50	50	50	3	NA	0	NA	0	NA	0	50	3	NA	NA	NA	NA	NA	NA	NA	NA	NA	NA	NA	NA	NA	NA	NA	NA	0	0	0	0	0	0	0	0	0
r446	0	0	0	0	0	0	0	0	0	0	0	0	1096	1096	1096	3	1096	3	NA	0	NA	0	NA	0	NA	NA	NA	NA	NA	NA	NA	NA	NA	NA	NA	NA	NA	NA	NA	NA	0	0	0	0	0	0	0	0	0
r447	0	0	0	0	0	0	0	0	0	0	0	0	322	322	322	3	NA	0	NA	0	322	3	NA	0	NA	NA	NA	NA	NA	NA	NA	NA	NA	NA	NA	NA	NA	NA	NA	NA	0	0	0	0	0	0	0	0	0
r448	0	0	0	0	0	0	0	0	0	0	0	0	67	67	67	3	NA	0	NA	0	NA	0	67	3	NA	NA	NA	NA	NA	NA	NA	NA	NA	NA	NA	NA	NA	NA	NA	NA	0	0	0	0	0	0	0	0	0
r449	0	0	0	0	0	0	0	0	0	0	0	0	91	91	91	3	NA	0	NA	0	NA	0	91	3	NA	NA	NA	NA	NA	NA	NA	NA	NA	NA	NA	NA	NA	NA	NA	NA	0	0	0	0	0	0	0	0	0
r44	10	11	21	1	6	7	11	10	21	4	0	4	232.182	229	233	11	NA	0	NA	0	232.182	11	NA	0	0.625	0.6875	0.65625	0.04	0.285714	0.152174	0.733333	0.588235	0.65625	0.181818	0	0.0816327	NA	NA	0.65625	NA	3.91543	4.30697	8.2224	0.391543	2.34926	2.7408	4.30697	3.91543	8.2224
r450	0	0	0	0	0	0	0	0	0	0	0	0	69	69	69	3	NA	0	NA	0	NA	0	69	3	NA	NA	NA	NA	NA	NA	NA	NA	NA	NA	NA	NA	NA	NA	NA	NA	0	0	0	0	0	0	0	0	0
r451	0	0	0	0	0	0	0	0	0	0	0	0	128	128	128	3	NA	0	NA	0	NA	0	128	3	NA	NA	NA	NA	NA	NA	NA	NA	NA	NA	NA	NA	NA	NA	NA	NA	0	0	0	0	0	0	0	0	0
r452	0	0	0	0	0	0	0	0	0	0	0	0	392	392	392	3	NA	0	NA	0	392	3	NA	0	NA	NA	NA	NA	NA	NA	NA	NA	NA	NA	NA	NA	NA	NA	NA	NA	0	0	0	0	0	0	0	0	0
r453	0	0	0	0	0	0	0	0	0	0	0	0	588	588	588	3	NA	0	588	3	NA	0	NA	0	NA	NA	NA	NA	NA	NA	NA	NA	NA	NA	NA	NA	NA	NA	NA	NA	0	0	0	0	0	0	0	0	0
r454	0	0	0	0	0	0	0	0	0	0	0	0	312	312	312	3	NA	0	NA	0	312	3	NA	0	NA	NA	NA	NA	NA	NA	NA	NA	NA	NA	NA	NA	NA	NA	NA	NA	0	0	0	0	0	0	0	0	0
r455	0	0	0	0	0	0	0	0	0	0	0	0	791	791	791	3	NA	0	791	3	NA	0	NA	0	NA	NA	NA	NA	NA	NA	NA	NA	NA	NA	NA	NA	NA	NA	NA	NA	0	0	0	0	0	0	0	0	0
r456	0	0	0	0	0	0	0	0	0	0	0	0	905	905	905	3	NA	0	905	3	NA	0	NA	0	NA	NA	NA	NA	NA	NA	NA	NA	NA	NA	NA	NA	NA	NA	NA	NA	0	0	0	0	0	0	0	0	0
r457	0	0	0	0	0	0	0	0	0	0	0	0	61	61	61	3	NA	0	NA	0	NA	0	61	3	NA	NA	NA	NA	NA	NA	NA	NA	NA	NA	NA	NA	NA	NA	NA	NA	0	0	0	0	0	0	0	0	0
r458	0	0	0	0	0	0	0	0	0	0	0	0	597	597	597	3	NA	0	597	3	NA	0	NA	0	NA	NA	NA	NA	NA	NA	NA	NA	NA	NA	NA	NA	NA	NA	NA	NA	0	0	0	0	0	0	0	0	0
r459	0	0	0	0	0	0	0	0	0	0	0	0	61	61	61	3	NA	0	NA	0	NA	0	61	3	NA	NA	NA	NA	NA	NA	NA	NA	NA	NA	NA	NA	NA	NA	NA	NA	0	0	0	0	0	0	0	0	0
r45	0	0	0	0	0	0	0	0	0	0	0	0	NA	Seq_Length	0	NA	0	NA	0	NA	0	NA	0	NA	NA	NA	NA	NA	NA	NA	NA	NA	NA	NA	NA	NA	NA	NA	NA	NA	NA	NA	NA	NA	NA	NA	NA	NA	NA
r460	0	0	0	0	0	0	0	0	0	0	0	0	796	796	796	3	NA	0	796	3	NA	0	NA	0	NA	NA	NA	NA	NA	NA	NA	NA	NA	NA	NA	NA	NA	NA	NA	NA	0	0	0	0	0	0	0	0	0
r461	0	0	0	0	0	0	0	0	0	0	0	0	176	176	176	3	NA	0	NA	0	NA	0	176	3	NA	NA	NA	NA	NA	NA	NA	NA	NA	NA	NA	NA	NA	NA	NA	NA	0	0	0	0	0	0	0	0	0
r462	0	0	0	0	0	0	0	0	0	0	0	0	191	191	191	3	NA	0	NA	0	NA	0	191	3	NA	NA	NA	NA	NA	NA	NA	NA	NA	NA	NA	NA	NA	NA	NA	NA	0	0	0	0	0	0	0	0	0
r463	0	0	0	0	0	0	0	0	0	0	0	0	1222	1222	1222	3	1222	3	NA	0	NA	0	NA	0	NA	NA	NA	NA	NA	NA	NA	NA	NA	NA	NA	NA	NA	NA	NA	NA	0	0	0	0	0	0	0	0	0
r464	0	0	0	0	0	0	0	0	0	0	0	0	280	280	280	3	NA	0	NA	0	280	3	NA	0	NA	NA	NA	NA	NA	NA	NA	NA	NA	NA	NA	NA	NA	NA	NA	NA	0	0	0	0	0	0	0	0	0
r465	0	0	0	0	0	0	0	0	0	0	0	0	69	69	69	3	NA	0	NA	0	NA	0	69	3	NA	NA	NA	NA	NA	NA	NA	NA	NA	NA	NA	NA	NA	NA	NA	NA	0	0	0	0	0	0	0	0	0
r466	0	0	0	0	0	0	0	0	0	0	0	0	128	128	128	3	NA	0	NA	0	NA	0	128	3	NA	NA	NA	NA	NA	NA	NA	NA	NA	NA	NA	NA	NA	NA	NA	NA	0	0	0	0	0	0	0	0	0
r467	0	0	0	0	0	0	0	0	0	0	0	0	88	88	88	3	NA	0	NA	0	NA	0	88	3	NA	NA	NA	NA	NA	NA	NA	NA	NA	NA	NA	NA	NA	NA	NA	NA	0	0	0	0	0	0	0	0	0
r468	0	0	0	0	0	0	0	0	0	0	0	0	191	191	191	3	NA	0	NA	0	NA	0	191	3	NA	NA	NA	NA	NA	NA	NA	NA	NA	NA	NA	NA	NA	NA	NA	NA	0	0	0	0	0	0	0	0	0
r469	0	0	0	0	0	0	0	0	0	0	0	0	325	325	325	3	NA	0	NA	0	325	3	NA	0	NA	NA	NA	NA	NA	NA	NA	NA	NA	NA	NA	NA	NA	NA	NA	NA	0	0	0	0	0	0	0	0	0
r46	0	0	0	0	0	0	1	0	1	0	1	1	558.238	551	561	21	NA	0	558.238	21	NA	0	NA	0	0	0	0	0	0	0	NA	0	1	0	NA	1	NA	0	NA	NA	0	0	0	0	0	0	0.0853024	0	0.0853024
r470	0	0	0	0	0	0	0	0	0	0	0	0	1475	1475	1475	3	1475	3	NA	0	NA	0	NA	0	NA	NA	NA	NA	NA	NA	NA	NA	NA	NA	NA	NA	NA	NA	NA	NA	0	0	0	0	0	0	0	0	0
r471	0	0	0	0	0	0	0	0	0	0	0	0	445	445	445	3	NA	0	NA	0	445	3	NA	0	NA	NA	NA	NA	NA	NA	NA	NA	NA	NA	NA	NA	NA	NA	NA	NA	0	0	0	0	0	0	0	0	0
r472	0	0	0	0	0	0	0	0	0	0	0	0	253	253	253	3	NA	0	NA	0	253	3	NA	0	NA	NA	NA	NA	NA	NA	NA	NA	NA	NA	NA	NA	NA	NA	NA	NA	0	0	0	0	0	0	0	0	0
r473	0	0	0	0	0	0	0	0	0	0	0	0	75	75	75	3	NA	0	NA	0	NA	0	75	3	NA	NA	NA	NA	NA	NA	NA	NA	NA	NA	NA	NA	NA	NA	NA	NA	0	0	0	0	0	0	0	0	0
r474	0	0	0	0	0	0	0	0	0	0	0	0	149	149	149	3	NA	0	NA	0	NA	0	149	3	NA	NA	NA	NA	NA	NA	NA	NA	NA	NA	NA	NA	NA	NA	NA	NA	0	0	0	0	0	0	0	0	0
r475	0	0	0	0	0	0	0	0	0	0	0	0	107	107	107	3	NA	0	NA	0	NA	0	107	3	NA	NA	NA	NA	NA	NA	NA	NA	NA	NA	NA	NA	NA	NA	NA	NA	0	0	0	0	0	0	0	0	0
r476	0	0	0	0	0	0	0	0	0	0	0	0	62	62	62	3	NA	0	NA	0	NA	0	62	3	NA	NA	NA	NA	NA	NA	NA	NA	NA	NA	NA	NA	NA	NA	NA	NA	0	0	0	0	0	0	0	0	0
r477	0	0	0	0	0	0	0	0	0	0	0	0	79	79	79	3	NA	0	NA	0	NA	0	79	3	NA	NA	NA	NA	NA	NA	NA	NA	NA	NA	NA	NA	NA	NA	NA	NA	0	0	0	0	0	0	0	0	0
r478	0	0	0	0	0	0	0	0	0	0	0	0	98	98	98	3	NA	0	NA	0	NA	0	98	3	NA	NA	NA	NA	NA	NA	NA	NA	NA	NA	NA	NA	NA	NA	NA	NA	0	0	0	0	0	0	0	0	0
r479	0	0	0	0	0	0	0	0	0	0	0	0	569	569	569	3	NA	0	569	3	NA	0	NA	0	NA	NA	NA	NA	NA	NA	NA	NA	NA	NA	NA	NA	NA	NA	NA	NA	0	0	0	0	0	0	0	0	0
r47	0	0	0	0	0	0	0	0	0	0	0	0	NA	Seq_Length	0	NA	0	NA	0	NA	0	NA	0	NA	NA	NA	NA	NA	NA	NA	NA	NA	NA	NA	NA	NA	NA	NA	NA	NA	NA	NA	NA	NA	NA	NA	NA	NA	NA
r480	0	0	0	0	0	0	0	0	0	0	0	0	79	79	79	3	NA	0	NA	0	NA	0	79	3	NA	NA	NA	NA	NA	NA	NA	NA	NA	NA	NA	NA	NA	NA	NA	NA	0	0	0	0	0	0	0	0	0
r481	0	0	0	0	0	0	0	0	0	0	0	0	141	141	141	3	NA	0	NA	0	NA	0	141	3	NA	NA	NA	NA	NA	NA	NA	NA	NA	NA	NA	NA	NA	NA	NA	NA	0	0	0	0	0	0	0	0	0
r482	0	0	0	0	0	0	0	0	0	0	0	0	76	76	76	3	NA	0	NA	0	NA	0	76	3	NA	NA	NA	NA	NA	NA	NA	NA	NA	NA	NA	NA	NA	NA	NA	NA	0	0	0	0	0	0	0	0	0
r483	0	0	0	0	0	0	0	0	0	0	0	0	55	55	55	3	NA	0	NA	0	NA	0	55	3	NA	NA	NA	NA	NA	NA	NA	NA	NA	NA	NA	NA	NA	NA	NA	NA	0	0	0	0	0	0	0	0	0
r484	0	0	0	0	0	0	0	0	0	0	0	0	92	92	92	3	NA	0	NA	0	NA	0	92	3	NA	NA	NA	NA	NA	NA	NA	NA	NA	NA	NA	NA	NA	NA	NA	NA	0	0	0	0	0	0	0	0	0
r485	0	0	0	0	0	0	0	0	0	0	0	0	336	336	336	3	NA	0	NA	0	336	3	NA	0	NA	NA	NA	NA	NA	NA	NA	NA	NA	NA	NA	NA	NA	NA	NA	NA	0	0	0	0	0	0	0	0	0
r486	0	0	0	0	0	0	0	0	0	0	0	0	138	138	138	3	NA	0	NA	0	NA	0	138	3	NA	NA	NA	NA	NA	NA	NA	NA	NA	NA	NA	NA	NA	NA	NA	NA	0	0	0	0	0	0	0	0	0
r487	0	0	0	0	0	0	0	0	0	0	0	0	199	199	199	3	NA	0	NA	0	NA	0	199	3	NA	NA	NA	NA	NA	NA	NA	NA	NA	NA	NA	NA	NA	NA	NA	NA	0	0	0	0	0	0	0	0	0
r488	0	0	0	0	0	0	0	0	0	0	0	0	209	209	209	3	NA	0	NA	0	209	3	NA	0	NA	NA	NA	NA	NA	NA	NA	NA	NA	NA	NA	NA	NA	NA	NA	NA	0	0	0	0	0	0	0	0	0
r489	0	0	0	0	0	0	0	0	0	0	0	0	101	101	101	3	NA	0	NA	0	NA	0	101	3	NA	NA	NA	NA	NA	NA	NA	NA	NA	NA	NA	NA	NA	NA	NA	NA	0	0	0	0	0	0	0	0	0
r48	65	129	194	487	440	927	0	13	13	1747	2382	4129	3298.14	3056	6186	14	3298.14	14	NA	0	NA	0	NA	0	0.0290958	0.0455026	0.0382718	0.268764	0.174326	0.213792	0	0.00440529	0.00247619	3.16486	4.09278	3.64109	0.0382718	NA	NA	NA	1.40772	2.79378	4.2015	10.5471	9.52917	20.0762	0	0.281544	0.281544
r490	0	0	0	0	0	0	0	0	0	0	0	0	105	105	105	3	NA	0	NA	0	NA	0	105	3	NA	NA	NA	NA	NA	NA	NA	NA	NA	NA	NA	NA	NA	NA	NA	NA	0	0	0	0	0	0	0	0	0
r491	0	0	0	0	0	0	0	0	0	0	0	0	116	116	116	3	NA	0	NA	0	NA	0	116	3	NA	NA	NA	NA	NA	NA	NA	NA	NA	NA	NA	NA	NA	NA	NA	NA	0	0	0	0	0	0	0	0	0
r492	0	0	0	0	0	0	0	0	0	0	0	0	214	214	214	3	NA	0	NA	0	214	3	NA	0	NA	NA	NA	NA	NA	NA	NA	NA	NA	NA	NA	NA	NA	NA	NA	NA	0	0	0	0	0	0	0	0	0
r493	0	0	0	0	0	0	0	0	0	0	0	0	137	137	137	3	NA	0	NA	0	NA	0	137	3	NA	NA	NA	NA	NA	NA	NA	NA	NA	NA	NA	NA	NA	NA	NA	NA	0	0	0	0	0	0	0	0	0
r494	0	0	0	0	0	0	0	0	0	0	0	0	63	63	63	3	NA	0	NA	0	NA	0	63	3	NA	NA	NA	NA	NA	NA	NA	NA	NA	NA	NA	NA	NA	NA	NA	NA	0	0	0	0	0	0	0	0	0
r495	0	0	0	0	0	0	0	0	0	0	0	0	139	139	139	3	NA	0	NA	0	NA	0	139	3	NA	NA	NA	NA	NA	NA	NA	NA	NA	NA	NA	NA	NA	NA	NA	NA	0	0	0	0	0	0	0	0	0
r496	0	0	0	0	0	0	0	0	0	0	0	0	50	50	50	3	NA	0	NA	0	NA	0	50	3	NA	NA	NA	NA	NA	NA	NA	NA	NA	NA	NA	NA	NA	NA	NA	NA	0	0	0	0	0	0	0	0	0
r497	0	0	0	0	0	0	0	0	0	0	0	0	59	59	59	3	NA	0	NA	0	NA	0	59	3	NA	NA	NA	NA	NA	NA	NA	NA	NA	NA	NA	NA	NA	NA	NA	NA	0	0	0	0	0	0	0	0	0
r498	0	0	0	0	0	0	0	0	0	0	0	0	124	124	124	3	NA	0	NA	0	NA	0	124	3	NA	NA	NA	NA	NA	NA	NA	NA	NA	NA	NA	NA	NA	NA	NA	NA	0	0	0	0	0	0	0	0	0
r499	0	0	0	0	0	0	0	0	0	0	0	0	227	227	227	3	NA	0	NA	0	227	3	NA	0	NA	NA	NA	NA	NA	NA	NA	NA	NA	NA	NA	NA	NA	NA	NA	NA	0	0	0	0	0	0	0	0	0
r49	1233	8	1241	25	6	31	92	4	96	55	7	62	5196.8	5193	5199	5	5196.8	5	NA	0	NA	0	NA	0	7.1686	0.470588	6.56614	0.0181159	0.315789	0.0221587	0.0700685	0.190476	0.071964	0.0407407	0.388889	0.0453216	6.56614	NA	NA	NA	47.4523	0.307882	47.7602	0.962131	0.230911	1.19304	3.54064	0.153941	3.69458
r4	0	0	0	0	0	0	0	0	0	0	0	0	NA	Seq_Length	0	NA	0	NA	0	NA	0	NA	0	NA	NA	NA	NA	NA	NA	NA	NA	NA	NA	NA	NA	NA	NA	NA	NA	NA	NA	NA	NA	NA	NA	NA	NA	NA	NA
r500	0	0	0	0	0	0	0	0	0	0	0	0	182	182	182	3	NA	0	NA	0	NA	0	182	3	NA	NA	NA	NA	NA	NA	NA	NA	NA	NA	NA	NA	NA	NA	NA	NA	0	0	0	0	0	0	0	0	0
r501	0	0	0	0	0	0	0	0	0	0	0	0	111	111	111	3	NA	0	NA	0	NA	0	111	3	NA	NA	NA	NA	NA	NA	NA	NA	NA	NA	NA	NA	NA	NA	NA	NA	0	0	0	0	0	0	0	0	0
r502	0	0	0	0	0	0	0	0	0	0	0	0	235	235	235	3	NA	0	NA	0	235	3	NA	0	NA	NA	NA	NA	NA	NA	NA	NA	NA	NA	NA	NA	NA	NA	NA	NA	0	0	0	0	0	0	0	0	0
r503	0	0	0	0	0	0	0	0	0	0	0	0	354	354	354	3	NA	0	NA	0	354	3	NA	0	NA	NA	NA	NA	NA	NA	NA	NA	NA	NA	NA	NA	NA	NA	NA	NA	0	0	0	0	0	0	0	0	0
r504	0	0	0	0	0	0	0	0	0	0	0	0	80	80	80	3	NA	0	NA	0	NA	0	80	3	NA	NA	NA	NA	NA	NA	NA	NA	NA	NA	NA	NA	NA	NA	NA	NA	0	0	0	0	0	0	0	0	0
r505	0	0	0	0	0	0	0	0	0	0	0	0	302	302	302	3	NA	0	NA	0	302	3	NA	0	NA	NA	NA	NA	NA	NA	NA	NA	NA	NA	NA	NA	NA	NA	NA	NA	0	0	0	0	0	0	0	0	0
r506	0	0	0	0	0	0	0	0	0	0	0	0	65	65	65	3	NA	0	NA	0	NA	0	65	3	NA	NA	NA	NA	NA	NA	NA	NA	NA	NA	NA	NA	NA	NA	NA	NA	0	0	0	0	0	0	0	0	0
r507	0	0	0	0	0	0	0	0	0	0	0	0	891	891	891	3	NA	0	891	3	NA	0	NA	0	NA	NA	NA	NA	NA	NA	NA	NA	NA	NA	NA	NA	NA	NA	NA	NA	0	0	0	0	0	0	0	0	0
r508	0	0	0	0	0	0	0	0	0	0	0	0	245	245	245	3	NA	0	NA	0	245	3	NA	0	NA	NA	NA	NA	NA	NA	NA	NA	NA	NA	NA	NA	NA	NA	NA	NA	0	0	0	0	0	0	0	0	0
r509	0	0	0	0	0	0	0	0	0	0	0	0	56	56	56	3	NA	0	NA	0	NA	0	56	3	NA	NA	NA	NA	NA	NA	NA	NA	NA	NA	NA	NA	NA	NA	NA	NA	0	0	0	0	0	0	0	0	0
r50	0	0	0	0	0	0	0	0	0	0	0	0	NA	Seq_Length	0	NA	0	NA	0	NA	0	NA	0	NA	NA	NA	NA	NA	NA	NA	NA	NA	NA	NA	NA	NA	NA	NA	NA	NA	NA	NA	NA	NA	NA	NA	NA	NA	NA
r510	0	0	0	0	0	0	0	0	0	0	0	0	94	94	94	3	NA	0	NA	0	NA	0	94	3	NA	NA	NA	NA	NA	NA	NA	NA	NA	NA	NA	NA	NA	NA	NA	NA	0	0	0	0	0	0	0	0	0
r511	0	0	0	0	0	0	0	0	0	0	0	0	95	95	95	3	NA	0	NA	0	NA	0	95	3	NA	NA	NA	NA	NA	NA	NA	NA	NA	NA	NA	NA	NA	NA	NA	NA	0	0	0	0	0	0	0	0	0
r512	0	0	0	0	0	0	0	0	0	0	0	0	566	566	566	3	NA	0	566	3	NA	0	NA	0	NA	NA	NA	NA	NA	NA	NA	NA	NA	NA	NA	NA	NA	NA	NA	NA	0	0	0	0	0	0	0	0	0
r513	0	0	0	0	0	0	0	0	0	0	0	0	123	123	123	3	NA	0	NA	0	NA	0	123	3	NA	NA	NA	NA	NA	NA	NA	NA	NA	NA	NA	NA	NA	NA	NA	NA	0	0	0	0	0	0	0	0	0
r514	0	0	0	0	0	0	0	0	0	0	0	0	137	137	137	3	NA	0	NA	0	NA	0	137	3	NA	NA	NA	NA	NA	NA	NA	NA	NA	NA	NA	NA	NA	NA	NA	NA	0	0	0	0	0	0	0	0	0
r515	0	0	0	0	0	0	0	0	0	0	0	0	96	96	96	3	NA	0	NA	0	NA	0	96	3	NA	NA	NA	NA	NA	NA	NA	NA	NA	NA	NA	NA	NA	NA	NA	NA	0	0	0	0	0	0	0	0	0
r516	0	0	0	0	0	0	0	0	0	0	0	0	76	76	76	3	NA	0	NA	0	NA	0	76	3	NA	NA	NA	NA	NA	NA	NA	NA	NA	NA	NA	NA	NA	NA	NA	NA	0	0	0	0	0	0	0	0	0
r517	0	0	0	0	0	0	0	0	0	0	0	0	52	52	52	3	NA	0	NA	0	NA	0	52	3	NA	NA	NA	NA	NA	NA	NA	NA	NA	NA	NA	NA	NA	NA	NA	NA	0	0	0	0	0	0	0	0	0
r518	0	0	0	0	0	0	0	0	0	0	0	0	88	88	88	3	NA	0	NA	0	NA	0	88	3	NA	NA	NA	NA	NA	NA	NA	NA	NA	NA	NA	NA	NA	NA	NA	NA	0	0	0	0	0	0	0	0	0
r519	0	0	0	0	0	0	0	0	0	0	0	0	70	70	70	3	NA	0	NA	0	NA	0	70	3	NA	NA	NA	NA	NA	NA	NA	NA	NA	NA	NA	NA	NA	NA	NA	NA	0	0	0	0	0	0	0	0	0
r51	169	8	177	7	10	17	23	11	34	17	15	32	1865.44	1713	1876	18	1865.44	18	NA	0	NA	0	NA	0	3.59574	0.222222	2.13253	0.0334928	0.294118	0.0699588	0.119171	0.333333	0.150442	0.0854271	0.517241	0.140351	2.13253	NA	NA	NA	5.03306	0.238251	5.27131	0.20847	0.297814	0.506284	0.684972	0.327595	1.01257
r520	0	0	0	0	0	0	0	0	0	0	0	0	51	51	51	3	NA	0	NA	0	NA	0	51	3	NA	NA	NA	NA	NA	NA	NA	NA	NA	NA	NA	NA	NA	NA	NA	NA	0	0	0	0	0	0	0	0	0
r521	0	0	0	0	0	0	0	0	0	0	0	0	221	221	221	3	NA	0	NA	0	221	3	NA	0	NA	NA	NA	NA	NA	NA	NA	NA	NA	NA	NA	NA	NA	NA	NA	NA	0	0	0	0	0	0	0	0	0
r522	0	0	0	0	0	0	0	0	0	0	0	0	52	52	52	3	NA	0	NA	0	NA	0	52	3	NA	NA	NA	NA	NA	NA	NA	NA	NA	NA	NA	NA	NA	NA	NA	NA	0	0	0	0	0	0	0	0	0
r523	0	0	0	0	0	0	0	0	0	0	0	0	90	90	90	3	NA	0	NA	0	NA	0	90	3	NA	NA	NA	NA	NA	NA	NA	NA	NA	NA	NA	NA	NA	NA	NA	NA	0	0	0	0	0	0	0	0	0
r524	0	0	0	0	0	0	0	0	0	0	0	0	109	109	109	3	NA	0	NA	0	NA	0	109	3	NA	NA	NA	NA	NA	NA	NA	NA	NA	NA	NA	NA	NA	NA	NA	NA	0	0	0	0	0	0	0	0	0
r525	0	0	0	0	0	0	0	0	0	0	0	0	88	88	88	3	NA	0	NA	0	NA	0	88	3	NA	NA	NA	NA	NA	NA	NA	NA	NA	NA	NA	NA	NA	NA	NA	NA	0	0	0	0	0	0	0	0	0
r526	0	0	0	0	0	0	0	0	0	0	0	0	388	388	388	3	NA	0	NA	0	388	3	NA	0	NA	NA	NA	NA	NA	NA	NA	NA	NA	NA	NA	NA	NA	NA	NA	NA	0	0	0	0	0	0	0	0	0
r527	0	0	0	0	0	0	0	0	0	0	0	0	207	207	207	3	NA	0	NA	0	207	3	NA	0	NA	NA	NA	NA	NA	NA	NA	NA	NA	NA	NA	NA	NA	NA	NA	NA	0	0	0	0	0	0	0	0	0
r528	0	0	0	0	0	0	0	0	0	0	0	0	167	167	167	3	NA	0	NA	0	NA	0	167	3	NA	NA	NA	NA	NA	NA	NA	NA	NA	NA	NA	NA	NA	NA	NA	NA	0	0	0	0	0	0	0	0	0
r529	0	0	0	0	0	0	0	0	0	0	0	0	66	66	66	4	NA	0	NA	0	NA	0	66	4	NA	NA	NA	NA	NA	NA	NA	NA	NA	NA	NA	NA	NA	NA	NA	NA	0	0	0	0	0	0	0	0	0
r52	9	15	24	36	5	41	57	13	70	16	9	25	209.512	192	215	43	NA	0	NA	0	210.293	41	193.5	2	0.0825688	0.555556	0.176471	0.439024	0.135135	0.344538	0.934426	0.448276	0.777778	0.156863	0.272727	0.185185	NA	NA	0.179688	0.125	0.999001	1.665	2.664	3.996	0.555001	4.551	6.32701	1.443	7.77001
r530	0	0	0	0	0	0	0	0	0	0	0	0	163	163	163	3	NA	0	NA	0	NA	0	163	3	NA	NA	NA	NA	NA	NA	NA	NA	NA	NA	NA	NA	NA	NA	NA	NA	0	0	0	0	0	0	0	0	0
r531	0	0	0	0	0	0	0	0	0	0	0	0	49	49	49	3	NA	0	NA	0	NA	0	49	3	NA	NA	NA	NA	NA	NA	NA	NA	NA	NA	NA	NA	NA	NA	NA	NA	0	0	0	0	0	0	0	0	0
r532	0	0	0	0	0	0	0	0	0	0	0	0	132	132	132	3	NA	0	NA	0	NA	0	132	3	NA	NA	NA	NA	NA	NA	NA	NA	NA	NA	NA	NA	NA	NA	NA	NA	0	0	0	0	0	0	0	0	0
r533	0	0	0	0	0	0	0	0	0	0	0	0	76	76	76	3	NA	0	NA	0	NA	0	76	3	NA	NA	NA	NA	NA	NA	NA	NA	NA	NA	NA	NA	NA	NA	NA	NA	0	0	0	0	0	0	0	0	0
r534	0	0	0	0	0	0	0	0	0	0	0	0	157	157	157	3	NA	0	NA	0	NA	0	157	3	NA	NA	NA	NA	NA	NA	NA	NA	NA	NA	NA	NA	NA	NA	NA	NA	0	0	0	0	0	0	0	0	0
r535	0	0	0	0	0	0	0	0	0	0	0	0	142	142	142	3	NA	0	NA	0	NA	0	142	3	NA	NA	NA	NA	NA	NA	NA	NA	NA	NA	NA	NA	NA	NA	NA	NA	0	0	0	0	0	0	0	0	0
r536	416	544	960	66	0	66	236	66	302	587	207	794	194.634	116	256	295	NA	0	NA	0	254.397	156	127.561	139	0.467942	1.99267	0.826162	0.0532688	0	0.0321012	0.220767	0.0878828	0.165934	0.817549	0.339344	0.597892	NA	NA	0.385827	1.1682	7.24524	9.47455	16.7198	1.14949	0	1.14949	4.11028	1.14949	5.25977
r537	0	0	0	0	0	0	0	0	0	0	0	0	89	89	89	3	NA	0	NA	0	NA	0	89	3	NA	NA	NA	NA	NA	NA	NA	NA	NA	NA	NA	NA	NA	NA	NA	NA	0	0	0	0	0	0	0	0	0
r538	0	0	0	0	0	0	0	0	0	0	0	0	72	72	72	3	NA	0	NA	0	NA	0	72	3	NA	NA	NA	NA	NA	NA	NA	NA	NA	NA	NA	NA	NA	NA	NA	NA	0	0	0	0	0	0	0	0	0
r539	0	0	0	0	0	0	0	0	0	0	0	0	53	53	53	3	NA	0	NA	0	NA	0	53	3	NA	NA	NA	NA	NA	NA	NA	NA	NA	NA	NA	NA	NA	NA	NA	NA	0	0	0	0	0	0	0	0	0
r53	57	0	57	1	1	2	1	6	7	0	0	0	191	191	191	25	NA	0	NA	0	NA	0	191	25	28.5	0	6.33333	0.0172414	0.166667	0.03125	0.0172414	6	0.118644	0	0	0	NA	NA	NA	6.33333	11.9372	0	11.9372	0.209424	0.209424	0.418848	0.209424	1.25654	1.46597
r540	0	0	0	0	0	0	0	0	0	0	0	0	49	49	49	3	NA	0	NA	0	NA	0	49	3	NA	NA	NA	NA	NA	NA	NA	NA	NA	NA	NA	NA	NA	NA	NA	NA	0	0	0	0	0	0	0	0	0
r54	21	2	23	5	0	5	59	4	63	58	0	58	195.667	187	197	21	NA	0	NA	0	NA	0	195.667	21	0.172131	0.5	0.18254	0.0362319	0	0.0347222	0.702381	2	0.732558	0.682353	0	0.637363	NA	NA	NA	0.18254	5.11073	0.486736	5.59747	1.21684	0	1.21684	14.3587	0.973473	15.3322
r55	15	6	21	59	46	105	99	73	172	66	29	95	211.2	142	292	30	NA	0	NA	0	286.286	14	145.5	16	0.0669643	0.0405405	0.0564516	0.327778	0.425926	0.364583	0.707143	0.901235	0.778281	0.381503	0.232	0.318792	NA	NA	0.0619469	0.0479452	2.36742	0.94697	3.31439	9.31187	7.2601	16.572	15.625	11.5215	27.1465
r56	0	0	0	0	0	0	0	0	0	0	0	0	NA	Seq_Length	0	NA	0	NA	0	NA	0	NA	0	NA	NA	NA	NA	NA	NA	NA	NA	NA	NA	NA	NA	NA	NA	NA	NA	NA	NA	NA	NA	NA	NA	NA	NA	NA	NA
r57	16	2	18	46	16	62	7	4	11	27	14	41	75	69	79	25	NA	0	NA	0	NA	0	75	25	0.2	0.0588235	0.157895	0.92	0.8	0.885714	0.0786517	0.125	0.0909091	0.391304	0.636364	0.450549	NA	NA	NA	0.157895	8.53333	1.06667	9.6	24.5333	8.53333	33.0667	3.73333	2.13333	5.86667
r58	0	0	0	0	0	0	0	0	0	0	0	0	NA	Seq_Length	0	NA	0	NA	0	NA	0	NA	0	NA	NA	NA	NA	NA	NA	NA	NA	NA	NA	NA	NA	NA	NA	NA	NA	NA	NA	NA	NA	NA	NA	NA	NA	NA	NA
r59	0	0	0	0	0	0	0	0	0	0	0	0	NA	Seq_Length	0	NA	0	NA	0	NA	0	NA	0	NA	NA	NA	NA	NA	NA	NA	NA	NA	NA	NA	NA	NA	NA	NA	NA	NA	NA	NA	NA	NA	NA	NA	NA	NA	NA
r5	0	0	0	0	0	0	0	0	0	0	0	0	NA	Seq_Length	0	NA	0	NA	0	NA	0	NA	0	NA	NA	NA	NA	NA	NA	NA	NA	NA	NA	NA	NA	NA	NA	NA	NA	NA	NA	NA	NA	NA	NA	NA	NA	NA	NA
r60	24	9	33	0	3	3	6	1	7	11	8	19	2107	2106	2108	3	2107	3	NA	0	NA	0	NA	0	1.41176	0.75	1.13793	0	0.166667	0.0508475	0.171429	0.05	0.127273	0.366667	0.615385	0.44186	1.13793	NA	NA	NA	3.79687	1.42383	5.22069	0	0.474608	0.474608	0.949217	0.158203	1.10742
r61	5	11	16	0	2	2	9	1	10	7	0	7	155.091	146	160	11	NA	0	NA	0	NA	0	155.091	11	0.3125	3.66667	0.842105	0	0.166667	0.0606061	0.75	0.0769231	0.4	0.5	0	0.25	NA	NA	NA	0.842105	2.93083	6.44783	9.37866	0	1.17233	1.17233	5.2755	0.586166	5.86166
r62	28	27	55	24	9	33	10	5	15	24	14	38	127.455	121	131	11	NA	0	NA	0	NA	0	127.455	11	0.482759	0.964286	0.639535	0.387097	0.195652	0.305556	0.131579	0.1	0.119048	0.387097	0.341463	0.368932	NA	NA	NA	0.639535	19.9715	19.2582	39.2297	17.1184	6.4194	23.5378	7.13267	3.56633	10.699
r63	87	29	116	58	0	58	110	0	110	29	0	29	254.767	250	255	30	NA	0	NA	0	254.767	30	NA	0	0.441624	NA	0.588832	0.256637	0	0.227451	0.632184	0	0.541872	0.113725	0	0.102113	NA	NA	0.588832	NA	11.383	3.79432	15.1773	7.58864	0	7.58864	14.3923	0	14.3923
r64	6	2	8	2	7	9	26	14	40	41	16	57	76.4375	71	81	32	NA	0	NA	0	NA	0	76.4375	32	0.0869565	0.0540541	0.0754717	0.0273973	0.21875	0.0857143	0.530612	0.56	0.540541	1.20588	0.695652	1	NA	NA	NA	0.0754717	2.45298	0.817661	3.27065	0.817661	2.86182	3.67948	10.6296	5.72363	16.3532
r65	11	2	13	6	1	7	4	0	4	2	3	5	191.379	173	193	29	NA	0	NA	0	NA	0	191.379	29	0.916667	0.5	0.8125	0.352941	0.2	0.318182	0.210526	0	0.16	0.0952381	1	0.208333	NA	NA	NA	0.8125	1.98198	0.36036	2.34234	1.08108	0.18018	1.26126	0.720721	0	0.720721
r66	114	5	119	12	28	40	32	37	69	6	6	12	303.182	289	317	22	NA	0	NA	0	303.182	22	NA	0	2.28	0.0704225	0.983471	0.0789474	0.583333	0.2	0.242424	0.948718	0.403509	0.0379747	0.0857143	0.0526316	NA	NA	0.983471	NA	17.0915	0.749625	17.8411	1.7991	4.1979	5.997	4.7976	5.54723	10.3448
r67	1	0	1	0	0	0	0	0	0	0	0	0	1510.4	1444	1527	5	1510.4	5	NA	0	NA	0	NA	0	NA	NA	NA	0	NA	0	0	NA	0	0	NA	0	NA	NA	NA	NA	0.132415	0	0.132415	0	0	0	0	0	0
r68	25	2	27	19	11	30	23	21	44	18	25	43	191.556	185	197	9	NA	0	NA	0	NA	0	191.556	9	0.416667	0.0350877	0.230769	0.287879	0.229167	0.263158	0.370968	0.552632	0.44	0.268657	0.735294	0.425743	NA	NA	NA	0.230769	14.5012	1.16009	15.6613	11.0209	6.38051	17.4014	13.3411	12.181	25.522
r69	27	11	38	7	13	20	23	0	23	21	2	23	130.773	125	139	22	NA	0	NA	0	NA	0	130.773	22	0.529412	0.733333	0.575758	0.0985915	1	0.238095	0.418182	0	0.283951	0.368421	0.0833333	0.283951	NA	NA	NA	0.575758	9.38478	3.82343	13.2082	2.43309	4.5186	6.95169	7.99444	0	7.99444
r6	640	113	753	27	20	47	75	49	124	39	28	67	1839.83	1684	1857	54	1839.83	54	NA	0	NA	0	NA	0	4.53901	1.16495	3.16387	0.035809	0.105263	0.0497881	0.106232	0.304348	0.143022	0.0525606	0.153846	0.0725108	3.16387	NA	NA	NA	6.44181	1.13738	7.57919	0.271764	0.201306	0.47307	0.754899	0.493201	1.2481
r70	4	8	12	7	2	9	3	6	9	22	0	22	156.111	147	162	18	NA	0	NA	0	NA	0	156.111	18	0.125	1	0.3	0.241379	0.142857	0.209302	0.0909091	0.6	0.209302	1.57143	0	0.733333	NA	NA	NA	0.3	1.42349	2.84698	4.27046	2.4911	0.711744	3.20285	1.06762	2.13523	3.20285
r71	0	0	0	0	0	0	0	0	0	0	0	0	NA	Seq_Length	0	NA	0	NA	0	NA	0	NA	0	NA	NA	NA	NA	NA	NA	NA	NA	NA	NA	NA	NA	NA	NA	NA	NA	NA	NA	NA	NA	NA	NA	NA	NA	NA	NA
r72	565	56	621	54	39	93	80	96	176	91	71	162	1765.71	1646	1823	7	1765.71	7	NA	0	NA	0	NA	0	2.51111	0.271845	1.44084	0.0733696	0.174888	0.096976	0.112676	0.578313	0.200913	0.130186	0.371728	0.182022	1.44084	NA	NA	NA	45.712	4.53074	50.2427	4.36893	3.15534	7.52427	6.47249	7.76699	14.2395
r73	25	37	62	5	9	14	12	21	33	7	22	29	117.625	109	130	16	NA	0	NA	0	NA	0	117.625	16	1.04167	0.711538	0.815789	0.113636	0.1125	0.112903	0.324324	0.308824	0.314286	0.166667	0.328358	0.266055	NA	NA	NA	0.815789	13.2837	19.6599	32.9437	2.65675	4.78215	7.43889	6.3762	11.1583	17.5345
r74	37	3	40	31	13	44	10	0	10	2	0	2	201.692	187	205	13	NA	0	NA	0	205	9	194.25	4	0.860465	0.230769	0.714286	0.632653	4.33333	0.846154	0.142857	0	0.116279	0.025641	0	0.0212766	NA	NA	0.487179	1.23529	14.1114	1.14416	15.2555	11.823	4.95805	16.7811	3.81388	0	3.81388
r75	0	0	0	0	0	0	0	0	0	0	0	0	NA	Seq_Length	0	NA	0	NA	0	NA	0	NA	0	NA	NA	NA	NA	NA	NA	NA	NA	NA	NA	NA	NA	NA	NA	NA	NA	NA	NA	NA	NA	NA	NA	NA	NA	NA	NA
r76	121	70	191	19	52	71	38	53	91	20	70	90	6094.22	6082	6113	18	6094.22	18	NA	0	NA	0	NA	0	1.57143	0.4	0.757937	0.106145	0.26943	0.19086	0.2375	0.276042	0.258523	0.11236	0.4	0.254958	0.757937	NA	NA	NA	1.10305	0.638127	1.74118	0.173206	0.474037	0.647243	0.346412	0.483153	0.829565
r77	114	87	201	47	23	70	35	52	87	44	29	73	5018.86	5013	5021	7	5018.86	7	NA	0	NA	0	NA	0	0.904762	0.836538	0.873913	0.243523	0.136905	0.193906	0.170732	0.374101	0.252907	0.22449	0.179012	0.203911	0.873913	NA	NA	NA	3.2449	2.47637	5.72128	1.33781	0.654674	1.99249	0.996243	1.48013	2.47637
r78	49	14	63	8	0	8	9	3	12	4	7	11	3608	3579	3622	4	3608	4	NA	0	NA	0	NA	0	2.33333	1.4	2.03226	0.129032	0	0.0930233	0.147541	0.142857	0.146341	0.0606061	0.411765	0.13253	2.03226	NA	NA	NA	3.39523	0.970067	4.3653	0.554324	0	0.554324	0.623614	0.207871	0.831486
r79	11	15	26	11	0	11	2	1	3	0	0	0	5717.5	5629	5878	4	5717.5	4	NA	0	NA	0	NA	0	0.846154	15	1.85714	0.846154	0	0.37931	0.0909091	0.0666667	0.0810811	0	0	0	1.85714	NA	NA	NA	0.480979	0.655881	1.13686	0.480979	0	0.480979	0.0874508	0.0437254	0.131176
r7	0	0	0	0	0	0	0	0	0	0	0	0	NA	Seq_Length	0	NA	0	NA	0	NA	0	NA	0	NA	NA	NA	NA	NA	NA	NA	NA	NA	NA	NA	NA	NA	NA	NA	NA	NA	NA	NA	NA	NA	NA	NA	NA	NA	NA
r80	80	22	102	10	1	11	0	19	19	11	19	30	552.571	544	559	21	NA	0	552.571	21	NA	0	NA	0	3.80952	0.564103	1.7	0.10989	0.0166667	0.0728477	0	0.452381	0.132867	0.122222	0.452381	0.227273	NA	1.7	NA	NA	6.89417	1.8959	8.79007	0.861772	0.0861772	0.947949	0	1.63737	1.63737
r81	22	2	24	2	2	4	10	0	10	0	0	0	253.538	250	254	13	NA	0	NA	0	253.538	13	NA	0	1.83333	1	1.71429	0.0625	1	0.117647	0.416667	0	0.357143	0	0	0	NA	NA	1.71429	NA	6.67476	0.606796	7.28155	0.606796	0.606796	1.21359	3.03398	0	3.03398
r82	0	2	2	0	0	0	2	0	2	3	0	3	67.9333	65	69	15	NA	0	NA	0	NA	0	67.9333	15	0	NA	0.4	0	0	0	0.666667	0	0.4	1.5	0	0.75	NA	NA	NA	0.4	0	1.96271	1.96271	0	0	0	1.96271	0	1.96271
r83	10	2	12	1	0	1	1	0	1	0	0	0	268.667	261	271	9	NA	0	NA	0	268.667	9	NA	0	5	NA	6	0.0909091	0	0.0769231	0.0909091	0	0.0769231	0	0	0	NA	NA	6	NA	4.13565	0.82713	4.96278	0.413565	0	0.413565	0.413565	0	0.413565
r84	90	48	138	12	30	42	17	24	41	97	39	136	639.727	380	806	11	NA	0	778.286	7	397.25	4	NA	0	0.714286	0.516129	0.630137	0.0588235	0.27027	0.133333	0.0854271	0.205128	0.129747	0.815126	0.382353	0.615385	NA	0.638554	0.603774	NA	12.7895	6.82109	19.6106	1.70527	4.26318	5.96845	2.4158	3.41054	5.82635
r85	26	18	44	11	1	12	13	4	17	6	8	14	171.957	158	174	23	NA	0	NA	0	NA	0	171.957	23	0.866667	1.38462	1.02326	0.244444	0.0333333	0.16	0.302326	0.148148	0.242857	0.12	0.347826	0.191781	NA	NA	NA	1.02326	6.57396	4.5512	11.1252	2.78129	0.252845	3.03413	3.28698	1.01138	4.29836
r86	12	7	19	16	4	20	1	0	1	8	4	12	66.3889	63	70	18	NA	0	NA	0	NA	0	66.3889	18	0.48	0.875	0.575758	0.761905	0.363636	0.625	0.0277778	0	0.0196078	0.275862	0.363636	0.3	NA	NA	NA	0.575758	10.0418	5.85774	15.8996	13.3891	3.34728	16.7364	0.83682	0	0.83682
r87	12	2	14	2	0	2	1	0	1	1	3	4	5244.73	5244	5245	11	5244.73	11	NA	0	NA	0	NA	0	3	0.666667	2	0.142857	0	0.105263	0.0666667	0	0.05	0.0666667	1.5	0.235294	2	NA	NA	NA	0.208001	0.0346669	0.242668	0.0346669	0	0.0346669	0.0173334	0	0.0173334
r88	0	0	0	0	0	0	0	0	0	0	0	0	NA	Seq_Length	0	NA	0	NA	0	NA	0	NA	0	NA	NA	NA	NA	NA	NA	NA	NA	NA	NA	NA	NA	NA	NA	NA	NA	NA	NA	NA	NA	NA	NA	NA	NA	NA	NA
r89	0	0	0	0	0	0	0	0	0	0	0	0	NA	Seq_Length	0	NA	0	NA	0	NA	0	NA	0	NA	NA	NA	NA	NA	NA	NA	NA	NA	NA	NA	NA	NA	NA	NA	NA	NA	NA	NA	NA	NA	NA	NA	NA	NA	NA
r8	61	58	119	6	6	12	123	8	131	29	26	55	5981.17	5620	6030	18	5981.17	18	NA	0	NA	0	NA	0	0.386076	1.45	0.60101	0.028169	0.0652174	0.0393443	1.28125	0.0888889	0.704301	0.152632	0.361111	0.209924	0.60101	NA	NA	NA	0.566593	0.538728	1.10532	0.0557305	0.0557305	0.111461	1.14247	0.0743073	1.21678
r90	6	3	9	6	0	6	1	0	1	1	1	2	2603.25	2600	2605	4	2603.25	4	NA	0	NA	0	NA	0	0.75	3	1	0.75	0	0.5	0.0769231	0	0.0588235	0.0769231	0.333333	0.125	1	NA	NA	NA	0.576203	0.288101	0.864304	0.576203	0	0.576203	0.0960338	0	0.0960338
r91	191	10	201	19	9	28	26	13	39	16	12	28	5852.91	5806	5881	11	5852.91	11	NA	0	NA	0	NA	0	3.13115	0.294118	2.11579	0.0815451	0.257143	0.104478	0.115044	0.419355	0.151751	0.0677966	0.375	0.104478	2.11579	NA	NA	NA	2.96667	0.155323	3.12199	0.295114	0.139791	0.434904	0.40384	0.20192	0.605759
r92	22	3	25	0	3	3	17	6	23	17	15	32	60.7333	55	63	15	NA	0	NA	0	NA	0	60.7333	15	0.647059	0.125	0.431034	0	0.125	0.0375	0.435897	0.285714	0.383333	0.435897	1.25	0.627451	NA	NA	NA	0.431034	24.1493	3.29308	27.4424	0	3.29308	3.29308	18.6608	6.58617	25.247
r93	0	0	0	0	0	0	0	0	0	0	0	0	201	201	201	8	NA	0	NA	0	201	8	NA	0	NA	NA	NA	NA	NA	NA	NA	NA	NA	NA	NA	NA	NA	NA	NA	NA	0	0	0	0	0	0	0	0	0
r94	158	22	180	1	1	2	10	6	16	6	4	10	1831.4	1828	1833	10	1831.4	10	NA	0	NA	0	NA	0	9.29412	2	6.42857	0.00574713	0.03125	0.00970874	0.0606061	0.222222	0.0833333	0.035503	0.137931	0.0505051	6.42857	NA	NA	NA	8.62728	1.20127	9.82855	0.054603	0.054603	0.109206	0.54603	0.327618	0.873649
r95	21	18	39	29	6	35	23	4	27	7	5	12	216.368	213	221	19	NA	0	NA	0	216.368	19	NA	0	0.355932	1.2	0.527027	0.568627	0.222222	0.448718	0.403509	0.137931	0.313953	0.0958904	0.178571	0.118812	NA	NA	0.527027	NA	5.10825	4.3785	9.48674	7.05424	1.4595	8.51374	5.59475	0.972999	6.56775
r96	201	34	235	8	9	17	18	14	32	42	21	63	2141	2132	2154	3	2141	3	NA	0	NA	0	NA	0	2.95588	0.772727	2.09821	0.0306513	0.130435	0.0515152	0.0717131	0.21875	0.101587	0.185022	0.368421	0.221831	2.09821	NA	NA	NA	31.2938	5.29348	36.5873	1.24552	1.40121	2.64674	2.80243	2.17967	4.9821
r97	224	129	353	75	94	169	87	137	224	134	131	265	2084.89	1979	2100	9	2084.89	9	NA	0	NA	0	NA	0	0.756757	0.356354	0.536474	0.168539	0.236776	0.200713	0.200924	0.387006	0.284625	0.34715	0.363889	0.355228	0.536474	NA	NA	NA	11.9378	6.87487	18.8126	3.99702	5.00959	9.00661	4.63654	7.30122	11.9378
r98	22	0	22	3	0	3	34	1	35	1	10	11	175.889	162	179	18	NA	0	NA	0	NA	0	175.889	18	0.578947	0	0.44898	0.0526316	0	0.0441176	1.30769	0.1	0.972222	0.0169492	10	0.183333	NA	NA	NA	0.44898	6.94883	0	6.94883	0.947568	0	0.947568	10.7391	0.315856	11.055
r99	6	3	9	0	0	0	0	0	0	0	0	0	2833.5	2832	2834	4	2833.5	4	NA	0	NA	0	NA	0	NA	NA	NA	0	0	0	0	0	0	0	0	0	NA	NA	NA	NA	0.529381	0.26469	0.794071	0	0	0	0	0	0
r9	3	7	10	8	5	13	0	4	4	3	0	3	5589.56	5300	5746	9	5589.56	9	NA	0	NA	0	NA	0	0.272727	0.777778	0.5	1.33333	0.454545	0.764706	0	0.333333	0.153846	0.272727	0	0.111111	0.5	NA	NA	NA	0.059635	0.139148	0.198783	0.159027	0.0993917	0.258418	0	0.0795134	0.0795134
[truncated: 3 more columns]
